1 **TITLE**

2 A novel system to map protein interactions reveals evolutionarily conserved immune evasion  
3 pathways on transmissible cancers

4

5 **SHORT TITLE**

6 Immune checkpoints on transmissible cancers

7

8 **AUTHORS**

9 Andrew S. Flies<sup>1\*</sup>, Jocelyn M. Darby<sup>1</sup>, Patrick R. Lennard<sup>1,2</sup>, Peter R. Murphy<sup>1,3</sup>, Chrissie E. B.  
10 Ong<sup>1</sup>, Terry L. Pinfold<sup>4</sup>, A. Bruce Lyons<sup>4</sup>, Gregory M. Woods<sup>1</sup>, Amanda L. Patchett<sup>1</sup>

11

12 **AFFILIATIONS**

13 <sup>1</sup>Menzies Institute for Medical Research, College of Health and Medicine, University of Tasmania,  
14 Hobart, TAS 7000, Australia

15 <sup>2</sup>The Roslin Institute and Royal School of Veterinary Studies, University of Edinburgh, Easter  
16 Bush Campus, Midlothian, EH25 9RG, UK

17 <sup>3</sup>University of Queensland Diamantina Institute, The University of Queensland, Translational  
18 Research Institute, Woolloongabba, Queensland, Australia

19 <sup>4</sup>School of Medicine, College of Health and Medicine, University of Tasmania, Hobart, TAS 7000,  
20 Australia

21

22 **CORRESPONDING AUTHOR CONTACT INFORMATION**

23 **Andrew S. Flies, PhD**

24 Menzies Institute for Medical Research, College of Health and Medicine

25 University of Tasmania

26 Private Bag 23, Hobart TAS 7000

27 phone: +61 3 6226 4614; email: [Andy.Flies@utas.edu.au](mailto:Andy.Flies@utas.edu.au)

28

29 **GRAPHICAL ABSTRACT**

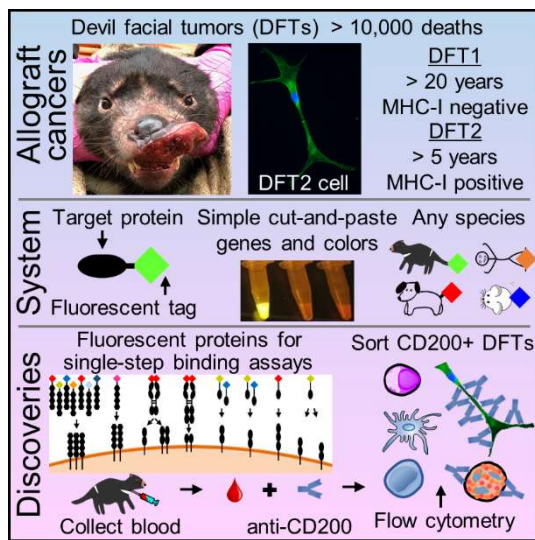

30

31

32

33 **ABSTRACT**

34 Immune checkpoint immunotherapy has revolutionized medicine, but translational success for  
35 new treatments remains low. Around 40% of humans and Tasmanian devils (*Sarcophilus harrisii*)  
36 develop cancer in their lifetime, compared to less than 10% for most species. Additionally, devils  
37 are affected by two of the three known transmissible cancers in mammals. Unfortunately, little is  
38 known about of immune checkpoints in devils and other non-model species, largely due to a lack  
39 of species-specific reagents. We developed a simple cut-and-paste reagent development method  
40 applicable to any vertebrate species and show that immune checkpoint interactions are conserved  
41 across 160 million years of evolution. The inhibitory checkpoint molecule CD200 is highly  
42 expressed on devil facial tumor cells. We are the first to demonstrate that co-expression of  
43 CD200R1 can block CD200 expression. The evolutionarily conserved pathways suggest that  
44 naturally occurring cancers in devils and other species can serve as models for understanding  
45 cancer and immunological tolerance.

46

47 **KEYWORDS**

48 immune checkpoint, wild immunology, reagent development, marsupial, transmissible cancer

49

50

## 51 INTRODUCTION

52 Metastatic cancer affects most mammals, but the cancer incidence can vary widely across  
53 phylogenetic groups and species (**Figure 1, Table S1**)<sup>1-9</sup>. In humans, the lifetime risk of  
54 developing cancer is around 40%<sup>10</sup>. This is in stark contrast to a general cancer incidence of 3%  
55 for mammals, 2% for birds, and 2% for reptiles reported by the San Diego Zoo (n=10,317)<sup>7,11</sup>. A  
56 more recent study at the Taipei Zoo reported cancer incidence of 8%, 4%, and 1% for mammals,  
57 birds, and reptiles, respectively (n=2,657)<sup>4</sup>. Cancer incidence in domestic animals is generally less  
58 than 10% (n=202,277)<sup>9</sup>. However, two studies performed 40 years apart reported that greater than  
59 40% of Tasmanian devils develop spontaneous, often severe neoplasia in their lifetime<sup>11,12</sup>. Devils  
60 are also unique because they are affected by two of the three known naturally-occurring  
61 transmissible cancers in vertebrate species<sup>13,14</sup>. Transmissible cancers are a distinct form of cancer  
62 in which the tumor cells function as an infectious pathogen and an allograft. Dogs (*Canis lupus*  
63 *familiaris*) are the only other vertebrate species affected by a transmissible cancer<sup>15</sup>, and  
64 interestingly some breeds of dogs also have high cancer incidence<sup>9,16</sup>.

65 The devil facial tumor (DFT) disease was first detected in Northwest Tasmania and has  
66 been a primary driver of an 80% decline in the wild Tasmanian devil population<sup>13,17</sup>. The clonal  
67 devil facial tumor (DFT1) cells have been continually transmitted among devils and is estimated  
68 to have killed at least 10,000 individuals since at least 1996. In 2014 a second independent  
69 transmissible Tasmanian devil facial tumor (DFT2) was discovered in wild devils<sup>14</sup> and 23 cases  
70 have been reported to date<sup>18</sup>. Genetic mismatches, particularly in the major histocompatibility  
71 complex (MHC) genes should lead to rejection of these transmissible tumors. Consequently, the  
72 role of devil MHC has been a focus of numerous studies (**Figure 1, Table S1**) to understand the  
73 lack of rejection of the transmissible tumors. These studies have revealed that the DFT1 cells

74 downregulate MHC class I (MHC-I) expression <sup>19</sup>, a phenomenon observed in many human  
75 cancers <sup>20</sup>. In contrast to DFT1 cells, the DFT2 cells do express MHC-I <sup>21</sup>. DFT1 and DFT2 cells  
76 also have 2,884 and 3,591 single nucleotide variants, respectively, that are not present in 46 normal  
77 devil genomes <sup>22</sup>. The continual transmission of DFT1 and DFT2, despite MHC-I expression by  
78 DFT2 cells and genetic mismatches between host and tumor, suggests that additional pathways are  
79 likely involved in immune evasion.

80 Human cancer treatment has been revolutionized in the past decade by manipulating  
81 interactions among immune checkpoint molecules <sup>23,24</sup>. These have proven broadly effective in  
82 part because they function across many different MHC types and tumor mutational patterns.  
83 However, these pathways have received little attention in transmissible cancers and other naturally  
84 occurring cancers in non-model species (**Figure 1, Table S1**) <sup>25-27</sup>. We have previously shown that  
85 the inhibitory immune checkpoint molecule programmed death ligand 1 (PDL1) is expressed in  
86 the DFT microenvironment and is upregulated by interferon-gamma (IFN $\gamma$ ) *in vitro* <sup>25</sup>. This finding  
87 led us to question which other immune checkpoint molecules play a role in immune evasion by  
88 the transmissible cancers and the devil's high spontaneous cancer incidence. Understanding this  
89 immune evasion in a natural environment has the potential to help protect this endangered species  
90 and identify protein interactions that are conserved across divergent species to improve  
91 translational success of animal models <sup>27</sup>. Unfortunately, a persistent limitation for immunology  
92 in non-traditional study species is a lack of species-specific reagents. Wildlife biologists and  
93 veterinarians are at the front lines of emerging infectious disease outbreaks, but they often lack  
94 species-specific reagents to fulfil the World Health Organization's call for "cross-cutting R&D  
95 preparedness" and perform mechanistic immunological investigations <sup>28</sup>.

96 To solve the paucity of reagents available for Tasmanian devils and address ongoing  
97 limitations for non-traditional study species, we developed a Fluorescent Adaptable Simple  
98 Theranostic (FAST) protein system that builds upon the diverse uses of fluorescent proteins  
99 previously reported<sup>29–33</sup>. This simple system can be used for rapid development of diagnostic and  
100 therapeutic (i.e. theranostic) immunological toolkits for any animal species (**Figure 2**). We  
101 demonstrate the versatility and impact of the FAST system by using it to confirm seven receptor-  
102 ligand interactions among twelve checkpoint proteins in devils.

103 In humans, these checkpoint proteins have been targets of immunotherapy in clinical trials,  
104 but the functional role and binding patterns of these proteins are unknown for most other species.  
105 We have used the FAST system to show that the inhibitory checkpoint protein CD200 is highly  
106 expressed on DFT cells, opening the door to single-cell phenotyping of circulating tumor cells  
107 (CTCs) in devil blood. Furthermore, we are the first to report that co-expression of CD200R1 can  
108 block surface expression of CD200 in any species. Understanding how clonal tumor cells graft  
109 onto new hosts, evade immune defenses and metastasize within a host will identify evolutionarily  
110 conserved immunological mechanisms to help improve cancer, infectious disease, and transplant  
111 outcomes for human and veterinary medicine.

112

## 113 **RESULTS**

### 114 **Fluorescent fusion proteins can be secreted from mammalian cells**

115 Initially, we developed FAST proteins to determine whether monomeric fluorescent  
116 proteins could be fused to devil proteins and secreted from mammalian cells (**Figure 2A** and **Table**  
117 **S2**). We used 41BB (TNFRSF9) for proof-of-concept studies by fusing the extracellular domain  
118 of devil 41BB checkpoint molecule to monomeric fluorescent proteins (**Figure 2A-B** and **Figure**

119 **S1**). We used wild-type Chinese hamster ovary (CHO) cells and CHO cells transfected with  
120 41BBL (TNFSF9) to confirm specificity of the 41BB FAST proteins and demonstrate that the  
121 fluorescent proteins (mAzurite, mCerulean3, mCherry, mCitrine, mOrange, Neptune2, and mTag-  
122 BFP (aka mBFP)) remained fluorescent when secreted from mammalian cells (**Figure 2C**).

123 We chose mCherry, mCitrine, mOrange, and mBFP for ongoing FAST protein  
124 development. Initial batches of FAST proteins were purified using the 6xHis-tag and eluted with  
125 imidazole. The gradient of FAST protein in the collection tubes was apparent when excited with  
126 blue light and visualized with an amber filter unit (**Figure 2D**), allowing immediate confirmation  
127 that the fluorescent protein DNA coding sequences were in-frame and the proteins were properly  
128 folded. mCherry was visible without excitation or filters (**Figure 2E**). After combining,  
129 concentrating, and sterile filtering the eluted fractions, 100  $\mu$ L was aliquoted and visualized again  
130 using blue light to confirm fluorescent signal (**Figure 2F**). A full step-by-step protocol and set of  
131 experimental templates for creating and testing FAST proteins for any species is available online  
132 with the supplementary material.

### 133 **Receptor-ligand binding confirmed in single-step staining assays**

134 We chose additional immune checkpoint molecules for FAST protein development  
135 (**Figure 3A**) based on targets of clinical trials and sequence analysis of devil genes<sup>27,34,35</sup>. We  
136 transfected the FAST protein expression vectors (**Table S2**) into CHO cells and tested the  
137 supernatant against CHO cell lines expressing full-length receptors. 41BB FAST proteins in  
138 supernatant exhibited strong binding to 41BBL cell lines, but the fluorescent signals from most  
139 other FAST proteins were too weak to confirm binding to the expected receptors (**Figure S2**). As  
140 FAST proteins do not require secondary reagents, we next incubated target cells with purified  
141 FAST proteins and added chloroquine to block the lysosomal protein degradation pathway<sup>36</sup>. This

142 allowed us to take advantage of receptor-mediated endocytosis, which can allow accumulation of  
143 captured fluorescent signals inside the target cells <sup>37</sup>. This protocol adjustment allowed  
144 confirmation that CD47-mCherry, CD200-mBFP, CD200-mOrange, CD200R1-mBFP, and  
145 CD200R1-mOrange, and PD1-mCitrine bound to their expected receptors (**Figure 3B**). We also  
146 demonstrated the flexibility of the FAST proteins by showing that alternative fusion conformations  
147 (**Figure S1C-D**), such as type II proteins (e.g. mCherry-41BBL) and a devil Fc-tag (e.g. CD80-  
148 Fc-mCherry) bound to their expected ligands (**Figure 3B**). The stability of the fusion proteins was  
149 demonstrated using supernatants that were stored at 4 °C for two months prior to use in a one-hour  
150 live-culture assay with chloroquine (**Figure S3**).

#### 151 **Cell lines secreting FAST proteins confirm protein interactions in live coculture assays**

152 To further streamline the reagent development process, we next took advantage of the  
153 single-step nature of FAST proteins (i.e. no secondary antibodies or labels needed) in live-cell  
154 coculture assays (**Figure 4A**). Cell lines secreting 41BB-mCherry, 41BBL-mCherry, or CD80-Fc-  
155 mCherry FAST proteins were mixed with cell lines expressing full-length 41BB, 41BBL, or  
156 CTLA4-mCitrine and cocultured at a 1:1 ratio overnight with chloroquine. Singlet cells were gated  
157 (**Figure 4B**) and binding of mCherry FAST proteins to CFSE or mCitrine-labelled target cells was  
158 analyzed (**Figure 4C**). The strongest fluorescent signal from 41BB-mCherry, 41BBL-mCherry  
159 and CD80-Fc-mCherry were detected when cocultured with their predicted receptors, 41BBL,  
160 41BB and CTLA4, respectively.

#### 161 **Optimization of the FAST-Fc construct**

162 The fluorescent binding signal of CD80-Fc-mCherry was lower than expected, so we next  
163 re-examined our Fc-tag construct. In humans and all other mammals examined to date the IgG  
164 heavy chain has glycine-lysine (Gly-Lys) residues at the C-terminus <sup>38</sup>; the initial devil IgG



165 constant region sequence available to us had an incomplete C-terminus, and thus our initial CD80-  
166 Fc-mCherry vector did not have the C-terminal Gly-Lys. We subsequently made a new FAST-Fc  
167 construct with CTLA4-Fc-mCherry, which exhibited strong binding to both CD80 and CD86  
168 transfected DFT cells (**Figure 4D**).

### 169 **CD200 mRNA and protein are highly expressed in DFT cells**

170 Analysis of previously published devil and DFT cell transcriptomes suggested that CD200  
171 mRNA is highly expressed in DFT2 cells and peripheral nerves, moderately expressed in DFT1  
172 cells, and lower in other healthy devil tissues (**Figure 5A**)<sup>34,35,39</sup>. As CD200 is an inhibitory  
173 molecule expressed on most human neuroendocrine neoplasms<sup>40</sup>, and both DFT1 and DFT2  
174 originated from Schwann cells<sup>35,41</sup>, we sought to investigate CD200 expression on DFT cells at  
175 the protein level. Staining of wild-type DFT1 and DFT2 cells with CD200R1-mOrange FAST  
176 protein showed minimal fluorescent signal (**Figure 5B**). However, overexpression of CD200 using  
177 a human EF1 $\alpha$  promoter yielded a detectable signal with CD200R1-mOrange binding to CD200  
178 on DFT1 cells. A weak signal from CD200-mOrange was detected on DFT1 cells overexpressing  
179 CD200R1 (**Figure 5B**). To confirm naturally-expressed CD200 on DFT cells we digested CD200  
180 and 41BB FAST proteins using TEV protease to remove the linker and fluorescent reporter. The  
181 digested proteins were then used to immunize mice for polyclonal sera production. We stained  
182 target CHO cell lines with pre-immune (PI) or immune (I) mouse sera collected after 3X  
183 immunizations. Only the immune sera showed strong binding to the respective CD200 and 41BB  
184 target cell lines (**Figure 5C**). After the final immunization (4X), we collected another batch of sera  
185 and tested it on DFT1 and DFT2 cells (**Figure 5D**). In agreement with the transcriptomic data for  
186 DFT cells<sup>34</sup>, the polyclonal sera revealed high levels of CD200 on DFT cells, but low levels of  
187 41BB.

## 188 **Overexpression of CD200R1 blocks surface expression of CD200**

189 In humans, overexpression of some checkpoint proteins can block surface expression of  
190 heterophilic binding partners in *cis* (e.g. CD80 and PDL1)<sup>42,43</sup>. As a potential route for disrupting  
191 the inhibitory effects of CD200 on anti-tumor immunity, we tested if overexpression of CD200R1  
192 on DFT cells could reduce CD200 surface expression. We stained a DFT1 strain C5065, and DFT1  
193 C5065 cells transfected to overexpress CD200 or CD200R1 with polyclonal anti-CD200 sera and  
194 secondary anti-mouse IgG AF647. We detected no surface protein expression of CD200 DFT1  
195 cells overexpressing CD200R1 (**Figure 5E**).

## 196 **Identification of DFT cells in whole blood using anti-CD200**

197 In addition to high expression of CD200 on neuroendocrine neoplasms<sup>40,44</sup>, CD200 is used  
198 as a diagnostic marker for several human blood cancers<sup>45-47</sup>. DFT cells metastasize in the majority  
199 of cases<sup>48</sup> and our transcriptome results (**Figure 5A**) suggest that CD200 mRNA is more highly  
200 expressed in DFT cells than in peripheral blood mononuclear cells (PBMCs)<sup>34,35</sup>. As a result, we  
201 tested if CD200 could be used to identify DFT cells in blood. We stained PBMCs and DFT2 cells  
202 separately with polyclonal anti-CD200 sera and anti-mouse AlexaFluor 647 and then analyzed  
203 CD200 expression by flow cytometry (**Figure S4A**). We then mixed the stained PBMCs and DFT2  
204 cells at ratios of 1:10 (**Figure S4A**) and 1:5 (**Figure S4B**) and analyzed the mixed populations.  
205 PBMCs showed minimal CD200 expression and background staining (**Figure S4**), whereas  
206 CD200 was highly expressed on DFT2 cells. CD200+ DFT2 cells were readily distinguishable  
207 from PBMCs.

208 As our RNAseq results only included mononuclear cells, we next performed a pilot test to  
209 determine if DFT cells could be spiked into whole devil blood and identified via flow cytometry  
210 using CD200 staining. DFT1 and DFT2 cells were labeled with CellTrace violet (CTV) and 10,000

211 cells were diluted directly into 100  $\mu$ L of whole blood from a healthy devil (n=1/treatment; n = 1  
212 devil). The cells were then stained with purified polyclonal anti-CD200 with and without  
213 secondary anti-mouse IgG AF647 prior to red blood cell (RBC) lysis. Initial results showed that  
214 DFT2 cells expressed CD200 above the leukocyte background, but that DFT1 cells could not be  
215 distinguished from leukocytes (**Figure S5**). To eliminate the secondary antibody step from the  
216 whole blood staining protocol we next labelled the polyclonal anti-CD200 and normal mouse  
217 serum (NMS) with a no-wash Zenon mouse IgG AF647 labeling reagent (n = 1/treatment; n = 2  
218 devils). This system again showed that CD200 expression could be used to identify DFT2 cells in  
219 blood (**Figure 6**), suggesting that CD200 is a candidate marker for identification of metastasizing  
220 DFT2 cells.

221

## 222 **DISCUSSION**

223 Naturally occurring cancers provide a unique opportunity to study immune evasion and the  
224 metastatic process across diverse hosts and environments. The exceptionally high cancer rate in  
225 Tasmanian devils coupled with the two transmissible tumors currently circulating in the wild  
226 warrants a thorough investigation of the devil immune system. However, taking advantage of such  
227 natural disease models has been out of reach for most species due to a lack of reagents. The FAST  
228 protein system we developed here is well-suited to discovering additional DFT markers, and more  
229 generally, filling the reagent gap for non-traditional species. For proteins like 41BB that have high  
230 affinity for 41BBL, FAST proteins can be used as detection reagents directly from supernatant.  
231 For other molecules with lower receptor-ligand affinity, the FAST proteins can be purified,  
232 digested with a protease to remove the non-target proteins and used for production of polyclonal  
233 or monoclonal antibodies.

234           The simple cut-and-paste methods for vector assembly lend the FAST protein system to  
235 entry level immunology and molecular biology skill sets. Additionally, the ability of FAST  
236 proteins to be used in live coculture assays and with elimination of secondary reagents, will  
237 increase efficiency and reduce experimental error for advanced human and mouse cancer  
238 immunology studies. For example, previous high-throughput studies have used a two-step staining  
239 process (i.e. recombinant protein + secondary antibody) to screen more than 2000 protein  
240 interactions<sup>49,50</sup>; this type of assay can be streamlined using FAST proteins to eliminate the need  
241 for secondary antibodies. Fc-tags or other homodimerization domains can be incorporated into  
242 FAST proteins to increase binding for low-affinity interactions.

243           Production of recombinant proteins in cell lines that closely resemble the physiological  
244 conditions of the native cell type (i.e. mammalian proteins produced in mammalian cell lines) are  
245 more likely to yield correct protein folding, glycosylation, and function than proteins produced  
246 using evolutionarily distant cell lines<sup>51</sup>. The fluorescent fusion proteins developed here that take  
247 advantage of natural receptor expression and cycling processes (e.g. CTLA4 transendocytosis) in  
248 eukaryotic target cells; bacterial protein production methods are not amenable to coculture with  
249 eukaryotic target cells in immunological assays<sup>52</sup>. Our demonstration of the FAST protein system  
250 in CHO cells, which are used to produce approximately 70% of recombinant pharmaceutical  
251 proteins<sup>53</sup>, suggest that this method can be efficiently integrated into existing research and  
252 development pipelines for humans and other vertebrate species.

253           A primary question in transmissible tumor research is why genetically mismatched cells  
254 are not rejected by the host. Successful infection of devils with DFT cells relies on the ability of  
255 the tumor allograft to evade and manipulate host defences. The "missing-self" hypothesis suggests  
256 that the lack of constitutive MHC-I expression on DFT1 cells should lead to natural killer (NK)

257 cell-mediated killing of the allograft tumor cells. Here we used the FAST protein system to develop  
258 a tool set to address this question and show that DFT1 and DFT2 cells express CD200 at higher  
259 levels than most other devil tissues examined to date. CD200 has been shown to directly inhibit  
260 NK cells in other species <sup>54-56</sup>, so overexpression of CD200 is a potential mechanism of immune  
261 evasion of NK responses by DFT cells.

262 We hypothesize that CD200 could be particularly important in DFT transmission as the  
263 CD200-CD200R pathway is critical to the initial stages of establishing transplant and allograft  
264 tolerance in other species <sup>57-59</sup>. In line with this hypothesis, a recent study reported that  
265 overexpressing several checkpoint molecules, including CD200, PDL1, and CD47, in mouse  
266 embryonic stem cells could be used to generate teratomas that could establish long-term allograft  
267 tolerance in fully immunocompetent hosts <sup>60</sup>. We have previously reported that PDL1 mRNA and  
268 protein are upregulated on DFT2 cells in response to IFN $\gamma$  <sup>25</sup>, and our transcriptome results show  
269 that CD47 is expressed at moderate to high levels in DFT cells. Here we show that overexpression  
270 of CD200R1 on DFT1 eliminates binding of our polyclonal anti-CD200 antibodies, suggesting  
271 that DFT cells overexpressing CD200R1 could be used to test the role of CD200 in allograft  
272 tolerance. Alternatively, genetic ablation of CD200 in DFT cells could be used as a complementary  
273 approach to examine the role of immune checkpoint molecules in DFT allograft tolerance. The  
274 CD200-CD200R1 pathway has been implicated in reducing IFN $\gamma$  production by dendritic cells <sup>59</sup>  
275 and decreasing the responsiveness of myeloid cells to IFN $\gamma$  stimulation <sup>61</sup>. Low MHC-I expression  
276 is a primary means of immune evasion by DFT1 cells, and disrupting the CD200-CD200R1  
277 pathway could facilitate improved recognition of DFT1 cells by CD8 T cells by enhancing IFN $\gamma$ -  
278 mediated MHC-I upregulation. Recent work in mice has identified immunosuppressive natural

279 regulatory plasma cells that express CD200, LAG3, PDL1, and PDL2; we have previously  
280 identified PDL1+ cells with plasma cell morphology near or within the DFT microenvironment <sup>25</sup>.

281 Previous DFT vaccine efforts have used killed DFT cells with adjuvants <sup>62,63</sup>. A similar  
282 approach to treat gliomas in dogs reported that tumor-lysate with CD200 peptides nearly doubled  
283 progression-free survival compared to tumor lysate alone <sup>64</sup>. Like devils, several breeds of dog are  
284 prone to cancer and these genetically-outbred large animal models provide a fertile ground for  
285 testing cancer therapies. Interestingly, the CD200 peptides are reported to provide agonistic  
286 function through CD200-like activation receptors (CD200R4) rather than by blocking CD200R1  
287 <sup>44,64</sup>. The functional role of CD200-CD200R pathway in devils remains to be elucidated, but the  
288 CD200R1<sub>NPLY</sub> inhibitory motif and key tyrosine residues are conserved in devil CD200R <sup>27,65,66</sup>,  
289 demonstrating this motif is conserved over 160 million years of evolutionary history <sup>67</sup>. In addition  
290 to agonistic peptides, several other options for countering CD200-CD200R immune inhibition are  
291 possible. Human chronic lymphocytic leukemia cells often express high levels of CD200, which  
292 can be downregulated in response to imiquimod <sup>68</sup>. Likewise, we have previously shown that DFT1  
293 cells downregulate expression of CD200 mRNA *in vitro* in response to imiquimod treatment <sup>34</sup>.

294 In mice, chronic salmonella and schistosoma infections upregulated both CD200 and  
295 CD200R <sup>69</sup>. Several viruses, including cytomegalovirus <sup>70</sup> and herpesvirus <sup>71</sup> manipulated the  
296 CD200-CD200R pathway as a means of immune evasion. Interestingly, in one of the longest  
297 running and most in-depth studies of host-pathogen coevolution, CD200R was shown to be under  
298 selection in rabbits in response to myxoma virus biocontrol agent <sup>72</sup>. As DFT1 and DFT2 have  
299 been circulating in devils for more than 20 years and 5 years, respectively, it will be important to  
300 monitor CD200/R expression and the potential evolution of paired activating and inhibitory  
301 receptors in these natural disease models <sup>73</sup>.

302 Immunophenotyping and single-cell RNAseq of circulating tumor cells (CTCs) has  
303 potential to identify key gene expression patterns associated with metastasis and tissue invasion.  
304 Periaxin (PRX) is the most sensitive and specific marker for DFT1 cells in immunohistochemistry  
305 assays <sup>74</sup>. Unfortunately, PRX is expressed primarily in the cytoplasm, which eliminates the  
306 possibility of using PRX as a marker to sort live cells via flow cytometry for single-cell RNAseq.  
307 However, CD200 is a potential marker for the identification of circulating tumor cells (CTCs) from  
308 devil blood. As proof of concept, DFT2 cells could be identified in devil blood spiked with DFT2  
309 cells. As CTCs are likely to be rare in the blood of most infected devils, CD200 alone would be  
310 insufficient for identifying DFT1 cells. Additional surface DFT markers would be required to  
311 purify CTCs for metastases and tissue invasion analyses. The FAST protein system provides a  
312 simple procedure to facilitate the production of a panel of DFT-markers to help identify key  
313 proteins in the metastatic process.

314 In summary, the simple “cut-and-paste” production of the vectors and single-step testing  
315 pipeline of the FAST system provided multiple benefits. The FAST system allowed us to  
316 characterize receptor-ligand interactions, and to identify evolutionarily conserved immune evasion  
317 pathways in naturally occurring transmissible cancers. Our initial implementation of the system  
318 confirmed numerous predicted protein interactions for the first time in a marsupial species and  
319 documented high expression of the inhibitory molecule CD200 on DFT cells. The high expression  
320 of CD200 in devil nervous tissues and neuroendocrine tumors, downregulation of CD200 in  
321 response to imiquimod, and binding of CD200 to CD200R1, is consistent with results from human  
322 and mouse studies. Consequently, the CD200/R pathway provides a promising immunotherapy  
323 and vaccine target for DFTs. Beyond this study, FAST proteins meet the key attributes needed for  
324 reagent development, such as being straightforward to make, stable, versatile, renewable, cheap,

325 and amenable to high-throughput testing<sup>75</sup>. The direct fusion of the reporter protein to the protein-  
326 of-interest allows for immediate feedback during transfection, supernatant testing, and protein  
327 purification; proteins with frameshifts, introduced stop codons, or folded improperly will not  
328 fluoresce and can be discarded after a simple visualization, rather than only after extensive  
329 downstream testing. Efficient mapping of immune checkpoint interactions across species can  
330 identify evolutionarily conserved immune evasion pathways and appropriate large animal models  
331 with naturally occurring cancer. This knowledge could inform veterinary and human medicine in  
332 the fields of immunological tolerance to tissue transplants, infectious disease, and cancer.

333

## 334 **MATERIALS AND METHODS**

### 335 **Study design**

336 The objectives of this study were to fill a major gap in our understanding of the mammalian  
337 immune system and to understand how genetically mismatched transmissible tumors evade host  
338 immunity. To achieve this goal, we developed a recombinant protein system that directly fuses  
339 proteins-of-interest to a fluorescent reporter protein. The first phase was to determine if the  
340 fluorescent protein remained fluorescent after secretion from mammalian cells and to confirm that  
341 proteins bound to their predicted receptors (i.e. ligands). Initial testing was performed in CHO  
342 cells and follow-up assays used devil cells. To further demonstrate the functionality of this system  
343 for antibody development, mice were immunized with either 41BB or CD200 proteins. Pre- and  
344 post-immunization polyclonal sera was used to confirm that the proteins used for immunization  
345 induced antibodies that specifically bound to surface-expressed recombinant proteins and native  
346 proteins on devil facial tumor cells.

### 347 **Target transcript amplification**



348 Target gene DNA sequences for vector construction were retrieved from Genbank,  
349 Ensembl or de novo transcriptome assemblies (**Table S2**)<sup>76</sup>. Target DNA was amplified from a  
350 cDNA template or existing plasmids using primers and PCR conditions shown in **Tables S2-S4**  
351 using Q5 High-Fidelity 2X Master Mix (New England Biolabs # M0494L). Primers were ordered  
352 with 5' base extensions that overlapped expression vectors on either side of the restriction sites.  
353 The amplified products were identified by gel electrophoresis and purified using Nucleospin PCR  
354 and Gel Clean Up Kit (Macherey-Nagel # 740609.5). Alternatively, DNA sequences were  
355 purchased as double stranded DNA gblocks (**Table S5**) (Integrated DNA Technologies) for direct  
356 assembly into expression vectors.

### 357 **Construction of all-in-one Sleeping Beauty transposon vectors**

358 All new plasmids were assembled using NEBuilder kit (NEB # E5520S) following the  
359 manufacturer's recommendations unless otherwise noted. DNA inserts, digested plasmids, and  
360 NEBuilder master mix were incubated for 60 minutes at 50 °C and then transformed into DH5 $\alpha$   
361 included with the NEBuilder kit. Plasmid digestions were performed following manufacturer  
362 recommendations and generally subjected to Antarctic phosphatase (New England Biolabs #  
363 M0289S) treatment to prevent potential re-annealing. Sleeping Beauty transposon vectors pSBbi-  
364 Hyg (Addgene # 60524), pSBbi-BH (Addgene # 60515), pSBtet-Hyg (Addgene # 60508), pSBtet-  
365 RH (Addgene # 60500) were gifts to Addgene from Eric Kowarz<sup>77</sup>. The pCMV(CAT)T7-SB100  
366 containing the CMV promoter and SB100X transposase was a gift to Addgene from Zsuzsanna  
367 Izsvak (Addgene # 34879)<sup>78</sup>. We first constructed an all-in-one Sleeping Beauty vector by  
368 inserting a CMV promoter and SB100X transposase from pCMV(CAT)T7-SB100<sup>78</sup> into pSBi-  
369 BH<sup>77</sup> (**Tables S3-S4**). This was accomplished by using pAF111-vec.FOR and pAF111.1.REV  
370 primers to amplify an overlap region from pSBbi-BH (insert 1) and pAF111-2.FOR and pAF111-

371 2.REV to amplify the CMV-SB100X region from pCMV(CAT)T7-SB100 (insert 2). The purified  
372 amplicons were then used for NEBuilder assembly of pAF111. The final all-in-one vectors  
373 pAF112 (hygromycin resistance and luciferase) and pAF123 (hygromycin resistance) were  
374 assembled from the pAF111 components. pAF112 was assembled by amplifying the Luc2  
375 luciferase gene (insert 1) from pSBtet-Hyg and the P2A-hygromycin resistance gene (insert 2)  
376 from pSBbi-BH and inserting into the pAF111 Bsu36I digest using NEBuilder. pSBbi-Hyg was  
377 Bsu36I-digested to obtain the hygromycin resistance gene, and this fragment was inserted into  
378 Bsu36I-digested pAF111 using T4 ligase cloning to replace the BFP-P2A-hygromycin segment in  
379 pAF111.

### 380 **Construction of full-length protein vectors**

381 All full-length gene coding sequences except CTLA4 were cloned into the a pAF112 SfiI  
382 digest (**Table S2**). All full-length vectors also contain luciferase with T2A peptide linked to the  
383 hygromycin resistance protein; luciferase was included for use in downstream functional testing  
384 that was not part of this study. Tasmanian devil CTLA4 was cloned into a NotI-HF and XmaI  
385 digest of pAF100 that was used in a different study but is derived from vectors pAF112 and  
386 pAF138. Additionally, we also used devil PDL1 (CHO.pAF48) and 41BBL (CHO.pAF56) cell  
387 lines developed using a vector system described previously <sup>25</sup>.

### 388 **Construction of FAST protein vectors**

389 Plasmids containing fluorescent protein coding sequences mCerulean3-N1 (Addgene #  
390 54730), mAzurite-N1 (Addgene # 54617), mOrange-N1 (Addgene # 54499), mNeptune2-N1  
391 (Addgene # 54837) were gifts to Addgene from Michael Davidson. mTag-BFP was amplified from  
392 pSBbi-BH, mCitrine was amplified from pAF71, and mCherry was amplified from pTRE-Dual2  
393 (Clontech # PT5038-5). pAF137 was constructed by amplifying the devil 41BB extracellular

394 domain with primers pAF137-1.FOR and pAF137-1.REV and amplifying mCherry with pAF137-  
395 2a.FOR and pAF137-2.REV (**Table S3-4**). 5' extensions on pAF137-1.FOR and pAF137-2.REV  
396 were used to create overlaps for NEBuilder assembly of pAF137 from a pAF123 SfiI-digested  
397 base vector. 3' extensions on pAF137-1.REV and pAF137-2a.FOR were used to create the linker  
398 that included an XmaI/SmaI restriction site, TEV cleavage tag, GSAGSAAGSGEF linker peptide,  
399 and 6x-His tag between the gene-of-interest and fluorescent reporter. The GSAGSAAGSGEF was  
400 chosen due to the low number of large hydrophobic residues and less repeated nucleic acids than  
401 are needed with other flexible linkers such as (GGGS)<sub>4</sub><sup>79</sup>. The pAF137 primer extensions also  
402 created 5' NotI and 3' NheI sites in the FAST vector to facilitate downstream swapping of  
403 functional genes and to create a Kozak sequence<sup>80</sup> (GCCGCCACC) upstream of the FAST protein  
404 open-reading frame. Following confirmation of correct assembly via DNA sequencing, the FAST  
405 41BB-mCherry (pAF137) was digested and used as the base vector (**Figure 2B** and **Figure S1A-**  
406 **B**) for development of FAST vectors with alternative fluorescent proteins. This was accomplished  
407 by digestion of pAF137 with Sall and NheI and then inserting PCR-amplified coding sequences  
408 for other fluorescent proteins using NEBuilder (**Tables S3-S4**).

409 Type I FAST (extracellular N-terminus, cytoplasmic C-terminus) protein vectors were  
410 constructed by digestion of 41BB FAST vectors with NotI and either XmaI or SmaI (**Figure 2B**  
411 and **Figure S1A-B**), and then inserting genes-of-interest (**Tables S2-4**). To create an Fc-tagged  
412 FAST protein we fused the extracellular domain of devil CD80 to the Fc region of the devil IgG  
413 (**Figure S1C**). The Fc region was amplified from a devil IgG plasmid provided by Lynn Corcoran  
414 (Walter and Eliza Hall Institute of Medical Research). All secreted FAST proteins in this study  
415 used their native signal peptides, except for 41BBL. 41BBL is a type II transmembrane protein in  
416 which the signal peptide directly precedes the cytoplasmic and transmembrane domains of the

417 protein (cytoplasmic N-terminus, extracellular C-terminus). As type I FAST vectors cannot  
418 accommodate this domain architecture, we developed an alternative base vector for type II  
419 transmembrane FAST proteins (**Figure S1D**). To increase the probability of efficient secretion of  
420 type II FAST proteins from CHO cells, we used the hamster IL-2 signal peptide (accession #  
421 NM\_001281629.1) at the N-terminus of the protein, followed by a Sall restriction site, mCherry,  
422 an NheI restriction site, 6x-His tag, GSAGSAAGSGEF linker, TEV cleavage site, XmaI/SmaI  
423 restriction site, the gene-of-interest, and a PmeI restriction site following the stop codon.

#### 424 **General plasmid assembly, transformation, and sequencing**

425       Following transformation of assembled plasmids, colony PCR was performed as an initial  
426 test of the candidate plasmids. Single colonies were inoculated directly into a OneTaq Hot Start  
427 Quick-Load 2X Master Mix (NEB # M0488) with primers pSB\_EF1a\_seq.FOR  
428 (atcttggttcattctcaagcctcag) and pSB\_bGH\_seq.REV (aggcacagtcgaggctgat). PCR was performed  
429 with 60 °C annealing temperature for 25-35 cycles. Colonies yielding appropriate band sizes were  
430 used to inoculate Luria broth with 100 µg/mL ampicillin for bacterial outgrowth overnight at 37  
431 °C and 200 RPM. The plasmids were purified using standard plasmid kits and prepared for Sanger  
432 sequencing using BigDye Terminator v3.1 Cycle Sequencing Kit (ThermoFisher # 4337455) with  
433 pSB\_EF1a\_seq.FOR and pSB\_bGH\_seq.REV primers. The BigDye® Terminator was removed  
434 using Agencourt CleanSEQ® (Beckman Coulter # A29151) before loading samples to an Applied  
435 Biosystems® 3500XL Genetic Analyzer (Applied Biosystems) for sequencing by fluorescence-  
436 based capillary electrophoresis.

#### 437 **General cell culture conditions**

438       DFT1 cell line C5065 and DFT2 cell line JV were cultured at 35 °C with 5% CO<sub>2</sub> in cRF10  
439 (10% complete RPMI (Gibco # 11875-093) with 2 mM L-glutamine, supplemented with 10% heat-

440 inactivated fetal bovine serum (FBS), and 1% antibiotic-antimycotic (ThermoFisher # 15240062).  
441 RPMI without phenol red (Sigma # R7509) was used to culture FAST protein cell lines when  
442 supernatants were collected for downstream flow cytometry assays. Devil peripheral blood cells  
443 were cultured in cRF10 at 35 °C with 5% CO<sub>2</sub>. CHO cells were cultured at 37 °C in cRF10 during  
444 transfections and drug selection but were otherwise cultured at 35 °C in cRF5 (5% complete  
445 RPMI). For production of purified recombinant proteins, stably transfected CHO cells were  
446 cultured in suspension in spinner flasks in chemically defined, serum-free CHO Ex-Cell (Sigma #  
447 14361C) media supplemented with 8 mM L-glutamine, 10 mM HEPES, 50 μM 2-ME, 1% (v/v)  
448 antibiotic-antimycotic, and 1 mM sodium pyruvate and without hygromycin.

#### 449 **Transfection and Generation of Recombinant Cell Lines**

450 Stable transfections of CHO and DFT cells were accomplished by adding 3 x 10<sup>5</sup> cells to  
451 each well in 6-well plates in cRF10 and allowing the cells to adhere overnight. The next day, 2 μg  
452 of plasmid DNA was added to 100 μL of PBS in microfuge tubes. Polyethylenimine (PEI) (linear,  
453 MW 25,000; Polysciences # 23966-2) was diluted to 60 μg/mL in PBS and incubated for at least  
454 two minutes. 100 μL of the PEI solution was added to the 100 μL of plasmid DNA in each tube to  
455 achieve a 3:1 ratio of PEI:DNA. The solution was mixed by gentle pipetting and incubated at room  
456 temperature for 15 minutes. Whilst the solution was incubating, the media on the CHO cells were  
457 replaced with fresh cRF10. All 200 μL from each DNA:PEI mix was then added dropwise to the  
458 CHO cells and gently rocked side-to-side and front-to-back to evenly spread the solution  
459 throughout the well. The plates were then incubated overnight at 37 °C with 5% CO<sub>2</sub>. The next  
460 day the plates were inspected for fluorescence and then the media was removed and replaced with  
461 cRF10 containing 1 mg/mL hygromycin (Sigma # H0654). The media was replaced with fresh  
462 cRF10 1 mg/ml hygromycin every 2-3 days for the next seven days until selection was complete.

463 The cells were then maintained in 0.2 mg/mL hygromycin in cRF5 at 35 °C with 5% CO<sub>2</sub>.  
464 Supernatant was collected 2-3 weeks post-transfection and stored at 4 °C for two months to assess  
465 stability of secreted FAST proteins.

#### 466 **Protein production and purification**

467 16 days post-transfection the first batch of FAST protein cell lines were adapted to a 1:1  
468 mix of cRF5 and chemically defined, serum free CHO Ex-cell media for 1-2 days to facilitate  
469 adaptation of the adherent CHO cells to suspension culture in serum-free media. At least 5x10<sup>7</sup>  
470 cells were then transferred to Proculture spinner flasks (Sigma # CLS45001L, CLS4500250) and  
471 stirred at 75 RPM at 35 °C in 5% CO<sub>2</sub> on magnetic stirring platforms (Integra Bioscience #  
472 183001). Cells were maintained at a density ranging from 5x10<sup>5</sup> to 2x10<sup>6</sup> cells/ml for 8-14 days.  
473 Supernatant was collected every 2-3 days, centrifuged at 3200 RCF for 10 minutes, stored at 4 °C,  
474 and then purified using the ÄKTA start protein purification system (GE Life Sciences #  
475 29022094). The supernatant was diluted 1:1 with 20 mM sodium phosphate pH 7.4 and then  
476 purified using HisTrap Excel columns (GE Life Sciences # 17-3712-05) according to the  
477 manufacturer's instructions. Samples were passed through the columns using a flow rate of 2  
478 mL/minute at 4 °C; all wash and elution steps were done at 1 mL/minute. Elution from HisTrap  
479 columns (GE Life Sciences # 17-3712-05) was accomplished using 0.5 M imidazole and  
480 fractionated into 1 ml aliquots using the Frac30 fraction collector (GE Life Sciences # 29023051).  
481 Fluorescence of FAST proteins was checked via brief excitation (**Figure 2D**) on a blue light  
482 transilluminator with an amber filter unit. In the case of mCherry chromogenic color was visible  
483 (**Figure 2E**) without excitation. Fractions containing target proteins were combined and diluted to  
484 15 mL with cold PBS, dialyzed (Sigma # PURX60005) in PBS at 4 °C, 0.22 µm sterile-filtered  
485 (Millipore # SLGV033RS) and concentrated using Amicon Ultra centrifugal filter units (Sigma #

486 Z706345). The protein concentration was quantified using the 280 nm absorbance on a Nanodrop  
487 spectrophotometer. Extinction coefficients using for each protein were calculated using the  
488 ProtParam algorithm<sup>81</sup>. The proteins were then aliquoted into microfuge tubes and frozen at -80  
489 °C until further use. The CTLA4-Fc-mCherry protein was designed, assembled, and tested  
490 separately from the other FAST proteins and was tested directly in supernatant without  
491 purification.

#### 492 **Preparation of CHO cells expressing full-length proteins for flow cytometry**

493 CHO cells expressing full-length proteins were thawed in cRF10 and then maintained in  
494 cRF5 with 0.2 mg/mL hygromycin. The adherent CHO cells were washed with PBS and incubated  
495 with trypsin for 5 minutes at 37 °C to remove cells from the culture flask. Trypsin was diluted 5X  
496 with cRF5 and centrifuged at 200 RCF for 5 minutes. Cells were resuspended in cRF5, counted  
497 (viability > 95% in all cases), and resuspended and aliquoted for assays as described below.

#### 498 **Initial staining of CHO cells with 41BB FAST protein supernatants (without chloroquine)**

499 Supernatants (cRF5) were collected from CHO cells expressing devil 41BB-extracellular  
500 domain fused to either mCherry (pAF137), mCitrine (pAF138), mOrange (pAF164), mBFP  
501 (pAF139), mAzurite (pAF160), mCerulean3 (pAF161), or mNeptune2 (pAF163) (**Tables S2-4**).  
502 The supernatant was spun for 10 minutes at 3200 RCF to remove cells and cellular debris, and  
503 then stored at 4 °C until further use. CHO cells expressing devil 41BBL (CHO.pAF56) and  
504 untransfected CHO cells were prepared as described above. Flow cytometry tubes were loaded  
505 with  $5 \times 10^4$  target CHO cells/well in cRF5, centrifuged 500 RCF for 3 minutes, and then  
506 resuspended in 200  $\mu$ L of supernatant from the 41BB FAST cell lines (n=1/treatment). The tubes  
507 were then incubated for 15 minutes at 4 °C, centrifuged at 500 RCF for 3 minutes, resuspended in  
508 400  $\mu$ L of cold FACS buffer, and stored on ice until the data were acquired on a Beckman-Coulter

509 Astrios flow cytometer (**Figure 2C**). All flow cytometry data was analyzed using FCS Express 6  
510 Flow Cytometry Software version 6 (Denovo Software).

#### 511 **Staining CHO cells with FAST protein supernatants (without chloroquine)**

512 U-bottom 96-well plates were loaded with  $1 \times 10^5$  target CHO cells/well in cRF5,  
513 centrifuged 500 RCF for 3 minutes, and then resuspended in 175  $\mu$ L of cRF5 supernatant from  
514 FAST cell lines collected 11 days after transfection (n=1/treatment). The plates were then  
515 incubated for 30 minutes at room temperature, centrifuged at 500 RCF for 3 minutes, resuspended  
516 in 200  $\mu$ L of cold FACS buffer, centrifuged again and fixed with FACS fix buffer (PBS, 0.02%  
517 NaN<sub>3</sub>, 0.4% formalin, 10g/L glucose). The cells were transferred to tubes, diluted with FACS  
518 buffer and analyzed on a Beckman-Coulter Astrios flow cytometer (**Figure S2**).

#### 519 **Staining CHO cells with purified FAST proteins (with chloroquine)**

520 Purified FAST proteins were diluted to 20  $\mu$ g/mL in cRF5, aliquoted into V-bottom 96-  
521 well transfer plates, and then stored at 37 °C until target cells were ready for staining. Target cells  
522 were resuspended in cRF5 with 100  $\mu$ M chloroquine and 100,000 cells/well were aliquoted into  
523 U-bottom 96-well plates. 100  $\mu$ L of the diluted FAST proteins (n=1/treatment, 2  
524 timepoints/treatment) were then transferred from the V-bottom plates into the U-bottom 96-well  
525 plates containing target cells. The final volumes and concentrations were 200  $\mu$ L/well in cRF5  
526 with 50  $\mu$ M chloroquine and 2  $\mu$ g/well of FAST proteins. One set of plates was incubated at 37 °C  
527 for 30 minutes and another set of plates was incubated at 37 °C overnight. The cells were then  
528 centrifuged 500 RCF for 3 minutes, the media decanted, and incubated for 5 minutes with 100  $\mu$ L  
529 of trypsin to dislodge adherent cells. The cells were then washed with 200  $\mu$ L of cold FACS buffer,  
530 fixed, resuspended in cold FACS buffer, and transferred to tubes for analysis on the Astrios flow  
531 cytometer (**Figure 3B**).



532 **Staining CHO cells with FAST supernatants (with chloroquine)**

533 The protocol for using FAST protein supernatants was the same above as the preceding  
534 experiment except for the modifications described here. Supernatants were collected 2-3 weeks  
535 post-transfection, centrifuged at 3200 RCF for 10 minutes, and stored at 4 °C for 2 months. Prior  
536 to staining for flow cytometry, the supernatant was 0.22 µm filtered. Supernatant was then loaded  
537 into V-bottom 96-well plates to facilitate rapid transfer to staining plates and stored at 37 °C until  
538 target cells were ready for staining. Target cells were prepared as described above except for being  
539 diluted in cRF5 with 100 µM chloroquine.  $2 \times 10^5$  cells/well (100 µL) were then loaded into U-  
540 bottom 96-well plates. 100 µL of FAST protein supernatant (n=1/treatment) was then transferred  
541 from the V-bottom plates to achieve 50 µM chloroquine and the cells were then incubated at 37  
542 °C for 60 minutes. The plates were then washed, fixed, and analyzed on the Astrios flow cytometer  
543 (**Figure S3**). A similar procedure was used for staining stably-transfected DFT cells with CTLA4-  
544 Fc-mCherry, except that the supernatant was used fresh (**Figure 4D**).

545 **Coculture assay with full-length target and FAST protein CHO cell lines (with chloroquine)**

546 CHO cells expressing full-length CTLA4 with a C-terminal mCitrine, and CHO cells  
547 expressing full-length 41BB or 41BBL were labelled with 5 µM CFSE; CFSE and mCitrine were  
548 analyzed using the same excitation laser (488 nm) and emission filters (513/26 nm).  $1 \times 10^5$  FAST  
549 protein-secreting cells were mixed with  $1 \times 10^5$  target cells in cRF5 with 50 µM chloroquine and  
550 incubated overnight at 37 °C in 96-well U-bottom plates (**Figure 4A**). The next day the cells were  
551 rinsed with PBS, trypsinized, washed, fixed, and resuspended in FACS buffer prior to running  
552 flow cytometry. Cells were gated on forward and side scatter (FSC x SSC) and for singlets (FSC-  
553 H x FSC-A). (**Figure 4B**). Data shown in **Figure 4C** is representative of n=3 technical

554 replicates/treatment. Data was collected using a Beckman Coulter MoFlo Astrios and analyzed  
555 using FCS Express.

### 556 **Analysis of checkpoint molecule expression in DFT cells and Tasmanian devil tissues**

557 RNAseq data was generated during previous experiments, aligned against the reference  
558 Tasmanian devil genome Devil\_ref v7.0 (GCA\_000189315.1) and summarised into normalized  
559 read counts as previously described<sup>34,35</sup>. RPKM-normalized read counts were produced in R using  
560 edgeR<sup>82</sup>. Genes were ranked from highest RPKM-normalized count to lowest RPKM-normalized  
561 count, and a heat map was produced for the genes of interest using the heatmap.2 function of  
562 gplots. Heatmap color represents gene ranking among 18,788 predicted protein-coding genes in  
563 the reference genome.

### 564 **Staining DFTs cell with CD200/R FAST proteins**

565 50,000 DFT cells/well were aliquoted into u-bottom 96-well plates, washed with 150  $\mu$ L  
566 of cRF10, and resuspended in 100  $\mu$ L of warm cRF10 containing 100  $\mu$ M chloroquine. 5  $\mu$ g of  
567 FAST protein/well was then added and mixed by pipetting. The plates were then incubated at 37  
568  $^{\circ}$ C for 30 minutes. The cells were then transferred to microfuge tubes without washing, stored on  
569 ice, and analyzed on a Beckman Coulter MoFlo Astrios (n=2/treatment).

### 570 **Polyclonal antibody development**

571 CD200 and 41BB FAST proteins were digested overnight with TEV protease (Sigma #  
572 T4455) at 4  $^{\circ}$ C in PBS. The cleaved linker and 6x-His tag were then removed using a His SpinTrap  
573 kit (GE Healthcare # 28-9321-71). Digested proteins in PBS were diluted 1:1 in Squalvax (Oz  
574 Biosciences # SQ0010) to a final concentration of 0.1  $\mu$ g/ $\mu$ L and was mixed using interlocked  
575 syringes to form an emulsion. Immunization of BALB/c mice for antibody production was  
576 approved by the University of Tasmania Animal Ethics Committee (# A0014680). Pre-immune

577 sera were collected prior to subcutaneous immunization with at least 50  $\mu$ L of the emulsion. On  
578 day 14 post-immunization the mice were boosted using a similar procedure. On day 50 the mice  
579 received a booster with proteins in IFAVax (Oz Biosciences # IFA0050); mice immunized with  
580 CD200 again received subcutaneous injections, whereas 41BB mice received subcutaneous and  
581 intraperitoneal injections. Pre-immune and sera collected after 3X immunizations were then tested  
582 by flow cytometry against CHO cells expressing either 41BB or CD200. CHO cells were prepared  
583 as described above and  $2 \times 10^5$  cells were incubated with mouse serum diluted 1:200 in PBS for 30  
584 minutes at 4 °C. The cells were then washed 2X and stained with 50  $\mu$ L of anti-mouse IgG  
585 AlexaFluor 647 diluted 1:1000 in FACS buffer. The cells were then washed 2X, stained with DAPI  
586 to identify live cells, and analyzed on a Cyan ADP flow cytometer (**Figure 5C**). CD200 and 41BB  
587 expression on DFT cells was tested using a procedure similar to the CHO cell staining, except the  
588 sera used was collected after 4X immunizations and was diluted 1:500 and analyzed on the BD  
589 FACSCanto II (**Figure 5D**).

#### 590 **Purification of antibodies from normal mouse serum (NMS) and anti-CD200 serum**

591 Approximately 200  $\mu$ L of normal mouse serum or anti-CD200 serum day 157 (after 4X  
592 immunizations) were purified using a protein G SpinTrap (GE Healthcare # 28-4083-47) according  
593 to the manufacturer's instructions. Serum was diluted 1:1 with 20 mM sodium phosphate, pH 7.0  
594 binding buffer, eluted with 0.1 M glycine-HCl, pH 2.7, and the pH was neutralized with 0.1 M  
595 glycine-HCl, pH 2.7. The eluted antibodies were then concentrated using an Amicon Ultra 0.5  
596 centrifugal unit (Merck # UFC500308) by centrifuging at 14,000 RCF for 30 minutes at 4 °C and  
597 then washing the antibodies with 400  $\mu$ L of PBS twice. The protein concentration was then  
598 quantified on a Nanodrop spectrophotometer at 280 nm using the extinction coefficients for IgG.

#### 599 **Testing CD200 expression on DFT cells that overexpress CD200R1**

600 50,000 DFT cells/well were aliquoted into u-bottom 96-well plates and washed with 200  
601  $\mu\text{L}$  of cold FACS buffer. Purified polyclonal anti-CD200 was diluted to 2.5  $\mu\text{g}/\text{mL}$  in cold FACS  
602 buffer and the cells in appropriate wells were resuspend in 100  $\mu\text{L}/\text{well}$  (0.25  $\mu\text{g}/\text{well}$ ) diluted  
603 antibody; wells that did not receive antibody were resuspended in 100  $\mu\text{L}$  of FACS buffer. The  
604 cells were incubated on ice for 20 minutes and then washed with 200  $\mu\text{L}$  of FACS buffer. Whilst  
605 incubating, anti-mouse IgG-AF647 was diluted to 1  $\mu\text{g}/\text{mL}$  in cold FACS buffer and then used to  
606 resuspend cells in the appropriate wells. The plates were incubated on ice for 20 minutes, then  
607 washed with 100  $\mu\text{L}$  of cold FACS buffer. The cells were then resuspended in 200  $\mu\text{L}$  of FACS  
608 fix and incubated on a rocking platform at room temp for 15 minutes. The cells were then  
609 centrifuged 500 RCF for 3 minutes at 4  $^{\circ}\text{C}$ , resuspended in 200  $\mu\text{L}$  FACS buffer and stored at 4  
610  $^{\circ}\text{C}$  until they were analyzed on a FACSCanto II (n=2/treatment).

#### 611 **Isolation of devil peripheral blood mononuclear cells**

612 Blood collection from Tasmanian devils was approved by the University of Tasmania  
613 Animal Ethics Committee (permit # A0014599) and the Tasmanian Department of Primary  
614 Industries, Parks, Water and Environment (DPIPWE). Blood was collected from the jugular vein  
615 and stored in EDTA tubes for transport to the lab. Blood was processed within three hours by  
616 diluting 1:1 with serum-free RPMI and then layering onto Histopaque (Sigma # 10771) before  
617 centrifuging at 400 RCF for 30 minutes. The interface containing the peripheral blood  
618 mononuclear cells was then collected using a transfer pipette, diluted with 50 mL of serum-free  
619 RPMI and centrifuged for 5 minutes at 500 RCF. Cells were washed with again with cRF10 and  
620 then either used fresh or stored at -80  $^{\circ}\text{C}$  until further use.

#### 621 **Detecting DFT2 cells in PBMC using CD200**

622 Frozen devil PBMC were thawed and cultured in cRF10 at 35 °C with 5% CO<sub>2</sub> for 2 hours,  
623 cells were then washed in FACS buffer, counted and 3x10<sup>5</sup> PBMC cells used per sample. DFT2.JV  
624 cells were removed from culture flasks, counted, and 2x10<sup>5</sup> cells used per sample. Samples were  
625 incubated with 50 µL normal goat serum (Thermo Cat # 01-6201) diluted 1:200 in FACS buffer  
626 for 15 minutes at 4 °C, 50 µL of anti-CD200 serum diluted 1:100 was added (1:200 final) for 30  
627 minutes at 4 °C. Cells were then washed 2X and stained with 50 µL of anti-mouse IgG AlexaFluor  
628 647 diluted to 1 µg/mL in FACS buffer for 30 minutes at 4 °C. The cells were then washed 2X,  
629 stained with DAPI (Sigma Cat # D9542) to identify live cells, and analyzed on the BD FACSCanto  
630 II. PBMC and DFT cells were run separately then PBMC and DFT2 mixed at a ratio of 10:1 by  
631 volume for the combined samples (n=1/treatment) (**Figure S4A**). The experiment was repeated  
632 (n=1/treatment), except that PBMCs and DFT cells were mixed at a 5:1 ratio (**Figure S4B**).

### 633 **Staining of DFT cells in devil whole blood**

634 DFT1.C5065 and DFT2.JV cells were labelled with 5 µM CellTrace violet (CTV) and  
635 cultured for three days at 37 °C. On the day of the assays peripheral blood from one devil was  
636 collected and stored at ambient temp for less than three hours. 100 µL of whole blood was aliquoted  
637 into 15 mL tubes and stored at ambient temperature whilst DFT cells were prepared. The media  
638 on CTV-labeled DFT cells were decanted and the cells were detached from the flask by incubating  
639 in 2.5 mL of TrypLE Select for 5 minutes at 37 °C. The cells were washed with cRF10,  
640 resuspended in cRF10, and counted. DFT cells were then diluted to 1x10<sup>4</sup> cells/mL in cRF10 and  
641 100 µL were aliquoted into appropriate 15 mL tubes containing 100 µL of whole blood. 1 µL of  
642 purified anti-CD200 (0.5 µg/tube) was diluted into the appropriate tubes and incubated for 15  
643 minutes at ambient temperature. Next, 0.5 µg/tube of anti-mouse IgG AF647 was added to each  
644 tube. Note: 0.5 µL (0.5 µg) of concentrated secondary antibody was accidentally added directly to

645 the tube for the data shown in the top row and middle column of **Figure S5A**; for all other tubes  
646 the secondary antibody was diluted 1:20 in PBS and 10  $\mu$ L was added to each tube. The cells were  
647 then incubated for 15 minutes at ambient temperature. The cells were then diluted in 1 mL  
648 ammonium chloride red blood cell (RBC) lysis buffer (150 mM  $\text{NH}_4\text{Cl}$ , 10 mM  $\text{KHCO}_3$ , 0.1 mM  
649 EDTA disodium ( $\text{Na}_2\text{-}2\text{H}_2\text{O}$ )) and mixed immediately gently pipetting five times. The cells were  
650 incubated at ambient temperature for 10 minutes and then diluted with 5 mL of PBS and  
651 centrifuged 500 RCF for 3 minutes. Some tubes contained residual RBCs, so the pellet was  
652 vigorously resuspended in 5 mL of RBC lysis buffer, incubated for 5 minutes, diluted with 5 mL  
653 of cold FACS buffer, and centrifuged 500 RCF for 3 minutes. The cells were then resuspended in  
654 250  $\mu$ L of FACS buffer and stored on ice until analysis on a Beckman Coulter MoFlo Astrios  
655 ( $n=1/\text{treatment}$ ). Data were analyzed in FCS Express version 6 (**Figure S5**).

656 The experiment above was repeated with the following modifications. DFT cells were  
657 labelled with 5  $\mu$ M of CFSE and incubated for two days at 37  $^\circ\text{C}$ . On the day of the assays fresh  
658 blood was collected from two devils. Purified anti-CD200 and NMS were labeled with Zenon  
659 mouse IgG AF647 (ThermoFisher # Z25008) and blocked with the Zenon blocking agent.  $1 \times 10^4$   
660 CFSE-labeled DFT cells were diluted directly into 100  $\mu$ L of whole blood in 15 mL tubes and 12  
661  $\mu$ L (2  $\mu$ L antibody, 5  $\mu$ L labeling agent, 5  $\mu$ L blocking agent) of Zenon AF647-labeled purified  
662 NMS or anti-CD200 were added directly to the cells. The cells were incubated for 30 minutes at  
663 ambient temperature. The cells were then gently resuspended in 2.5 mL of RBC lysis buffer and  
664 incubated for 10 minutes at ambient temperature. The cells were diluted with 10 mL of PBS and  
665 centrifuged 500 RCF for 3 minutes. The cells were resuspended in 1.5 mL of RBC lysis buffer and  
666 incubated for another 10 minutes to lyse residual RBCs. The tubes were then resuspended in 9 mL  
667 of cRF10 and centrifuged 500 RCF for 3 minutes. The cells were resuspended in 350  $\mu$ L of cold

668 FACS buffer containing 200 ng/mL of DAPI and stored on ice until analysis on a Beckman Coulter  
669 MoFlo Astrios (n=1/treatment for n = 2 devils) (**Figure 6**).

670

## 671 **ACKNOWLEDGMENTS**

672 We wish to thank Ginny Ralph for her ongoing care of Tasmanian devils, and the Bonorong  
673 Wildlife Sanctuary for providing access to Tasmanian devils, and Ruth Pye for providing care for  
674 devils and collecting blood samples. We would like to thank John Hayball and Georgina  
675 Kalodimos for advice and assistance, Mahalia Kingsley and Nirdesh Poudel for plasmid  
676 construction, Nick Blackburn for bioinformatics assistance, Lynn Corcoran for the devil IgG  
677 plasmid, James Murphy for a devil IL-15 plasmid, Emily Flies for editing the manuscript, and  
678 Kay Holekamp for her comments on the manuscript. **Funding:** ARC DECRA grant #  
679 DE180100484, ARC Linkage grant # LP0989727, ARC Discovery grant # DP130100715, Morris  
680 Animal Foundation Grant-in-Aid # D14ZO-410, University of Tasmania Foundation Dr Eric  
681 Guiler Tasmanian Devil Research Grant through funds raised by the Save the Tasmanian Devil  
682 Appeal (2013, 2015, 2017, 2018), and Entrepreneurs' Programme - Research Connections grant  
683 with Nexvet Australia Pty. Ltd. # RC50680.

684

## 685 **AUTHOR CONTRIBUTIONS**

686 ASF designed the study; ALP, ASF, CEBO, PRL, and PRM developed the technology; ASF,  
687 CEBO, PRL, PRM, JMD, and TLP performed the experiments; ALP performed bioinformatic  
688 analyses; ALP, ASF, JMD and PRL created the figures; ALP, ASF, PRL, JMD, TLP, and GMW  
689 analyzed the data; ASF wrote the manuscript and all authors edited the manuscript.

690

691 **AVAILABILITY OF DATA AND MATERIALS**

692 All data are included with the paper. The FAST base vectors (pAF92.3 pAF112.7, pAF123.1,  
693 pAF138.7, pAF139.2, pAF160.1, pAF161.3, pAF163.1, pAF164.3, pAF197) have been submitted  
694 to Addgene for distribution c(deposit # 77504).

695

696 **CONFLICT OF INTEREST**

697 The authors received funding from Nexvet Australia Pty. Ltd for related studies.

698



699 **REFERENCES**

- 700 1 Albuquerque TAF, Drummond do Val L, Doherty A, de Magalhães JP. From humans to  
701 hydra: patterns of cancer across the tree of life. *Biol Rev* 2018; **93**: 1715–1734.
- 702 2 Abu-Helil B, Van Der Weyden L. Metastasis in the wild: investigating metastasis in non-  
703 laboratory animals. *Clin Exp Metastasis* 2019. doi:10.1007/s10585-019-09956-3.
- 704 3 Olds JE, Burrough ER, Fales-Williams AJ, Lehmkuhl A, Madson D, Patterson AJ *et al.*  
705 Retrospective Evaluation of Cases of Neoplasia in a Captive Population of Egyptian Fruit  
706 Bats ( *Rousettus Aegyptiacus* ). *J Zoo Wildl Med* 2015; **46**: 325–332.
- 707 4 Chu PY, Zhuo YX, Wang FI, Jeng CR, Pang VF, Chang PH *et al.* Spontaneous neoplasms  
708 in zoo mammals, birds, and reptiles in Taiwan - A 10-year survey. *Anim Biol* 2012; **62**:  
709 95–110.
- 710 5 Deus A De, Alves F, Siqueira DB De, Rameh-de-albuquerque LC. Breast Carcinoma with  
711 Pulmonary Metastasis in Armadillo (*Eupharactus sexcinctus*). *Acta Sci Vet* 2018; **46**: 1–5.
- 712 6 Kruse TN, Garner MM, Bonar CJ. A Retrospective Study of Pathologic Findings in  
713 Captive Rock Hyrax ( *Procavia Capensis* ) in the United States. *J Zoo Wildl Med* 2015;  
714 **46**: 798–805.
- 715 7 Effron M, Griner L, Benirschke K. Nature and rate of neoplasia found in captive wild  
716 mammals, birds, and reptiles at necropsy. *J Natl Cancer Inst* 1977; **59**: 185–198.
- 717 8 Ratcliffe HL. Incidence and nature of tumors in captive wild mammals and birds. *Am J*  
718 *Cancer* 1933; **17**: 116–135.
- 719 9 Priester WA, Mantel N. Occurrence of tumors in domestic animals. Data from 12 United  
720 States and Canadian colleges of veterinary medicine. *J Natl Cancer Inst* 1971; **47**: 1333–  
721 1344.

- 722 10 Howlader N, Noone A, Krapcho M, Miller D, Brest A, Yu M *et al.* SEER Cancer  
723 Statistics Review, 1975-2016. Bethesda, MD, United States, 2016.
- 724 11 Griner LA. Neoplasms in Tasmanian devils (*Sarcophilus harrisii*). *J Natl Cancer Inst*  
725 1979; **62**: 589–595.
- 726 12 Peck SJ, Michael SA, Knowles G, Davis A, Pemberton D. Causes of mortality and severe  
727 morbidity requiring euthanasia in captive Tasmanian devils (*Sarcophilus harrisii*) in  
728 Tasmania. *Aust Vet J* 2019; **97**: 89–92.
- 729 13 Pearse A-M, Swift K. Allograft theory: transmission of devil facial-tumour disease.  
730 *Nature* 2006; **439**: 549.
- 731 14 Pye RJ, Pemberton D, Tovar C, Tubio JMC, Dun KA, Fox S *et al.* A second transmissible  
732 cancer in Tasmanian devils. *Proc Natl Acad Sci* 2016; **113**: 374–379.
- 733 15 Murgia C, Pritchard JK, Kim SY, Fassati A, Weiss RA. Clonal Origin and Evolution of a  
734 Transmissible Cancer. *Cell* 2006; **126**: 477–487.
- 735 16 Fleming JM, Creevy KE, Promislow DEL. Mortality in North American Dogs from 1984  
736 to 2004: An Investigation into Age-, Size-, and Breed-Related Causes of Death. *J Vet*  
737 *Intern Med* 2011; **25**: 187–198.
- 738 17 Lazenby BT, Tobler MW, Brown WE, Hawkins CE, Hocking GJ, Hume F *et al.* Density  
739 trends and demographic signals uncover the long-term impact of transmissible cancer in  
740 Tasmanian devils. *J Appl Ecol* 2018; **55**: 1368–1379.
- 741 18 James S, Jennings G, Kwon YM, Stammnitz M, Fraik A, Storer A *et al.* Tracing the rise  
742 of malignant cell lines: distribution, epidemiology and evolutionary interactions of two  
743 transmissible cancers in Tasmanian devils. *Evol Appl* 2019; : eva.12831.
- 744 19 Siddle H V., Kreiss A, Tovar C, Yuen CK, Cheng Y, Belov K *et al.* Reversible epigenetic

- 745 down-regulation of MHC molecules by devil facial tumour disease illustrates immune  
746 escape by a contagious cancer. *Proc Natl Acad Sci* 2013; **110**: 5103–8.
- 747 20 Yoshihama S, Roszik J, Downs I, Meissner TB, Vijayan S, Chapuy B *et al.* NLRC5/MHC  
748 class I transactivator is a target for immune evasion in cancer. *Proc Natl Acad Sci* 2016;  
749 **113**: 5999–6004.
- 750 21 Caldwell A, Coleby R, Tovar C, Stammnitz MR, Mi Kwon Y, Owen RS *et al.* The newly-  
751 arisen devil facial tumour disease 2 (DFT2) reveals a mechanism for the emergence of a  
752 contagious cancer. *Elife* 2018; **7**. doi:10.7554/eLife.35314.
- 753 22 Stammnitz MR, Coorens THH, Gori KC, Hayes D, Fu B, Wang J *et al.* The Origins and  
754 Vulnerabilities of Two Transmissible Cancers in Tasmanian Devils. *Cancer Cell* 2018;  
755 **33**: 607-619.e15.
- 756 23 Topalian SL, Hodi FS, Brahmer JR, Gettinger SN, Smith DC, McDermott DF *et al.*  
757 Safety, Activity, and Immune Correlates of Anti-PD-1 Antibody in Cancer. *N Engl J Med*  
758 2012; **366**: 2443–2454.
- 759 24 Larkin J, Chiarion-Sileni V, Gonzalez R, Grob JJ, Cowey CL, Lao CD *et al.* Combined  
760 Nivolumab and Ipilimumab or Monotherapy in Untreated Melanoma. *N Engl J Med* 2015;  
761 **373**: 23–34.
- 762 25 Flies AS, Bruce Lyons A, Corcoran LM, Papenfuss AT, Murphy JM, Knowles GW *et al.*  
763 PD-L1 is not constitutively expressed on tasmanian devil facial tumor cells but is strongly  
764 upregulated in response to IFN- $\gamma$  and can be expressed in the tumor microenvironment.  
765 *Front Immunol* 2016; **7**: 581.
- 766 26 Ong CEB, Lyons AB, Woods GM, Flies AS. Inducible IFN- $\gamma$  Expression for MHC-I  
767 Upregulation in Devil Facial Tumor Cells. *Front Immunol* 2018; **9**: 3117.

- 768 27 Flies AS, Blackburn NB, Lyons AB, Hayball JD, Woods GM. Comparative analysis of  
769 immune checkpoint molecules and their potential role in the transmissible tasmanian devil  
770 facial tumor disease. *Front Immunol* 2017; **8**: 513.
- 771 28 World Health Organization (WHO). WHO R&D Blueprint for action to prevent  
772 epidemics. World Health Organization, 2016<http://www.who.int/blueprint/en/> (accessed 1  
773 May2018).
- 774 29 Shaner NC, Campbell RE, Steinbach PA, Giepmans BNG, Palmer AE, Tsien RY.  
775 Improved monomeric red, orange and yellow fluorescent proteins derived from  
776 *Discosoma* sp. red fluorescent protein. *Nat Biotechnol* 2004; **22**: 1567–72.
- 777 30 Cabantous S, Terwilliger TC, Waldo GS. Protein tagging and detection with engineered  
778 self-assembling fragments of green fluorescent protein. *Nat Biotechnol* 2005; **23**: 102–  
779 107.
- 780 31 Cha HJ, Dalal NN, Bentley WE. Secretion of human interleukin-2 fused with green  
781 fluorescent protein in recombinant *Pichia pastoris*. *Appl Biochem Biotechnol* 2005; **126**:  
782 1–11.
- 783 32 Duellman T, Burnett J, Yang J. Quantitation of secreted proteins using mCherry fusion  
784 constructs and a fluorescent microplate reader. *Anal Biochem* 2015; **473**: 34–40.
- 785 33 Kammertoens T, Friese C, Arina A, Idel C, Briesemeister D, Rothe M *et al*. Tumour  
786 ischaemia by interferon- $\gamma$  resembles physiological blood vessel regression. *Nature* 2017;  
787 **545**: 98–102.
- 788 34 Patchett AL, Wilson R, Charlesworth JC, Corcoran LM, Papenfuss AT, Lyons AB *et al*.  
789 Transcriptome and proteome profiling reveals stress-induced expression signatures of  
790 imiquimod-treated Tasmanian devil facial tumor disease (DFTD) cells. *Oncotarget* 2018;

- 791           **9**: 15895–15914.
- 792    35    Patchett AL, Coorens THH, Darby J, Wilson R, McKay MJ, Kamath KS *et al.* Two of a  
793           kind: transmissible Schwann cell cancers in the endangered Tasmanian devil (*Sarcophilus*  
794           *harrisii*). *Cell Mol Life Sci* 2019; : 1–12.
- 795    36    Seglen PO, Grinde B, Solheim AE. Inhibition of the Lysosomal Pathway of Protein  
796           Degradation in Isolated Rat Hepatocytes by Ammonia, Methylamine, Chloroquine and  
797           Leupeptin. *Eur J Biochem* 1979; **95**: 215–225.
- 798    37    Qureshi OS, Zheng Y, Nakamura K, Attridge K, Manzotti C, Schmidt EM *et al.* Trans-  
799           endocytosis of CD80 and CD86: a molecular basis for the cell extrinsic function of  
800           CTLA-4. *Science* 2011; **332**: 600–603.
- 801    38    van den Bremer ET, Beurskens FJ, Voorhorst M, Engelberts PJ, de Jong RN, van der  
802           Boom BG *et al.* Human IgG is produced in a pro-form that requires clipping of C-terminal  
803           lysines for maximal complement activation. *MAbs* 2015; **7**: 672–680.
- 804    39    Patchett AL, Latham R, Brettingham-Moore KH, Tovar C, Lyons AB, Woods GM. Toll-  
805           like receptor signaling is functional in immune cells of the endangered Tasmanian devil.  
806           *Dev Comp Immunol* 2015; **53**: 123–133.
- 807    40    Love JE, Thompson K, Kilgore MR, Westerhoff M, Murphy CE, Papanicolau-Sengos A  
808           *et al.* CD200 Expression in Neuroendocrine Neoplasms. *Am J Clin Pathol* 2017; **148**:  
809           236–242.
- 810    41    Murchison EP, Tovar C, Hsu A, Bender HS, Kheradpour P, Rebbeck CA *et al.* The  
811           Tasmanian devil transcriptome reveals schwann cell origins of a clonally transmissible  
812           cancer. *Science* 2010; **327**: 84–87.
- 813    42    Haile ST, Bosch JJ, Agu NI, Zeender AM, Somasundaram P, Srivastava MK *et al.* Tumor

- 814 cell programmed death ligand 1-mediated T cell suppression is overcome by coexpression  
815 of CD80. *J Immunol* 2011; **186**: 6822–9.
- 816 43 Sugiura D, Maruhashi T, Okazaki I, Shimizu K, Maeda TK, Takemoto T *et al.* Restriction  
817 of PD-1 function by *cis* -PD-L1/CD80 interactions is required for optimal T cell  
818 responses. *Science* 2019; : eaav7062.
- 819 44 Moertel CL, Xia J, LaRue R, Waldron NN, Andersen BM, Prins RM *et al.* CD200 in CNS  
820 tumor-induced immunosuppression: The role for CD200 pathway blockade in targeted  
821 immunotherapy. *J Immunother Cancer* 2014; **2**: 46.
- 822 45 Challagundla P, Medeiros LJ, Kanagal-Shamanna R, Miranda RN, Jorgensen JL.  
823 Differential Expression of CD200 in B-Cell Neoplasms by Flow Cytometry Can Assist in  
824 Diagnosis, Subclassification, and Bone Marrow Staging. *AJCP / Orig Artic Am J Clin*  
825 *Pathol* 2014; **142**: 837–844.
- 826 46 Spacek M, Karban J, Radek M, Babunkova E, Kvasnicka J, Jaksa R *et al.* CD200  
827 Expression Improves Differential Diagnosis Between Chronic Lymphocytic Leukemia  
828 and Mantle Cell Lymphoma. *Blood* 2014; **124**.
- 829 47 Saksena A, Yin CC, Xu J, Li J, Zhou J, Wang SA *et al.* CD23 expression in mantle cell  
830 lymphoma is associated with CD200 expression, leukemic non-nodal form, and a better  
831 prognosis. *Hum Pathol* 2019; **89**: 71–80.
- 832 48 Loh R, Hayes D, Mahjoor A, O'Hara A, Pyecroft S, Raidal S. The immunohistochemical  
833 characterization of devil facial tumor disease (DFTD) in the Tasmanian Devil  
834 (*Sarcophilus harrisii*). *Vet Pathol* 2006; **43**: 896–903.
- 835 49 Yao S, Zhu Y, Zhu G, Augustine M, Zheng L, Goode DJ *et al.* B7-h2 is a costimulatory  
836 ligand for CD28 in human. *Immunity* 2011; **34**: 729–740.

- 837 50 Wang J, Sanmamed MF, Datar I, Su TT, Ji L, Sun J *et al.* Fibrinogen-like Protein 1 Is a  
838 Major Immune Inhibitory Ligand of LAG-3. *Cell* 2018; **0**.  
839 doi:10.1016/J.CELL.2018.11.010.
- 840 51 Aricescu AR, Lu W, Jones EY. A time- and cost-efficient system for high-level protein  
841 production in mammalian cells. *Acta Crystallogr Sect D Biol Crystallogr* 2006; **62**: 1243–  
842 1250.
- 843 52 Consortium SG, Biologiques A et F des M, Center BSG, Consortium CSG, Innovation IC  
844 for S and F, Center ISP *et al.* Protein production and purification. *Nat Methods* 2008; **5**:  
845 135.
- 846 53 Jayapal KP, Wlaschin KF, Hu WS, Yap MGS. Recombinant protein therapeutics from  
847 CHO cells - 20 years and counting. *Chem Eng Prog* 2007; **103**: 40–47.
- 848 54 Atfy M. CD200 Suppresses the Natural Killer Cells and Decreased its Activity in Acute  
849 Myeloid Leukemia Patients. *J Leuk* 2015; **3**.[https://www.omicsonline.org/open-](https://www.omicsonline.org/open-access/cd200-suppresses-the-natural-killer-cells-and-decreased-its-activity-in-acutemyeloid-leukemia-patients-2329-6917-1000190.pdf)  
850 [access/cd200-suppresses-the-natural-killer-cells-and-decreased-its-activity-in-](https://www.omicsonline.org/open-access/cd200-suppresses-the-natural-killer-cells-and-decreased-its-activity-in-acutemyeloid-leukemia-patients-2329-6917-1000190.pdf)  
851 [acutemyeloid-leukemia-patients-2329-6917-1000190.pdf](https://www.omicsonline.org/open-access/cd200-suppresses-the-natural-killer-cells-and-decreased-its-activity-in-acutemyeloid-leukemia-patients-2329-6917-1000190.pdf) (accessed 18 Apr2019).
- 852 55 Coles SJ, Man S, Hills R, Wang EC, Burnett A, Darley RL *et al.* Over-Expression of  
853 CD200 In Acute Myeloid Leukemia Mediates the Expansion of Regulatory T-  
854 Lymphocytes and Directly Inhibits Natural Killer Cell Tumor Immunity. *Blood* 2015; **116**:  
855 491.
- 856 56 Coles SJ, Wang ECY, Man S, Hills RK, Burnett AK, Tonks A *et al.* CD200 expression  
857 suppresses natural killer cell function and directly inhibits patient anti-tumor response in  
858 acute myeloid leukemia. *Leukemia* 2011; **25**: 792–9.
- 859 57 Gorczynski RM, Chen Z, Khatri I, Yu K. Graft-infiltrating cells expressing a CD200

- 860 transgene prolong allogeneic skin graft survival in association with local increases in  
861 Foxp3 +Treg and mast cells. *Transpl Immunol* 2011; **25**: 187–193.
- 862 58 Gorczynski RM, Chen Z, He W, Khatri I, Sun Y, Yu K *et al.* Expression of a CD200  
863 transgene is necessary for induction but not maintenance of tolerance to cardiac and skin  
864 allografts. *J Immunol* 2009; **183**: 1560–1568.
- 865 59 Gorczynski L, Chen Z, Hu J, Kai Y, Lei J, Ramakrishna V *et al.* Evidence That an OX-2-  
866 Positive Cell Can Inhibit the Stimulation of Type 1 Cytokine Production by Bone  
867 Marrow-Derived B7-1 (and B7-2)-Positive Dendritic Cells. *J Immunol* 1999; **162**: 774–  
868 781.
- 869 60 Harding J, Vintersten-Nagy K, Shutova M, Yang H, Tang JK, Massumi M *et al.* Induction  
870 of long-term allogeneic cell acceptance and formation of immune privileged tissue in  
871 immunocompetent hosts. Cold Spring Harbor Laboratory, 2019 doi:10.1101/716571.
- 872 61 Jenmalm MC, Cherwinski H, Bowman EP, Phillips JH, Sedgwick JD. Regulation of  
873 Myeloid Cell Function through the CD200 Receptor. *J Immunol* 2014; **176**: 191–199.
- 874 62 Tovar C, Pye RJ, Kreiss A, Cheng Y, Brown GK, Darby J *et al.* Regression of devil facial  
875 tumour disease following immunotherapy in immunised Tasmanian devils. *Sci Rep* 2017;  
876 **7**: 43827.
- 877 63 Pye R, Patchett A, McLennan E, Thomson R, Carver S, Fox S *et al.* Immunization  
878 strategies producing a humoral IgG immune response against devil facial tumor disease in  
879 the majority of Tasmanian devils destined for wild release. *Front Immunol* 2018; **9**: 259.
- 880 64 Olin MR, Ampudia-Mesias E, Pennell CA, Sarver A, Chen CC, Moertel CL *et al.*  
881 Treatment combining CD200 immune checkpoint inhibitor and tumor-lysate vaccination  
882 after surgery for pet dogs with high-grade glioma. *Cancers (Basel)* 2019; **11**: 137.



- 883 65 Zhang S, Phillips JH. Identification of tyrosine residues crucial for CD200R-mediated  
884 inhibition of mast cell activation. *J Leukoc Biol* 2005; **79**: 363–368.
- 885 66 Hatherley D, Lea SM, Johnson S, Barclay AN. Structures of CD200/CD200 receptor  
886 family and implications for topology, regulation, and evolution. *Structure* 2013; **21**: 820–  
887 832.
- 888 67 Luo ZX, Yuan CX, Meng QJ, Ji Q. A Jurassic eutherian mammal and divergence of  
889 marsupials and placentals. *Nature* 2011; **476**: 442–445.
- 890 68 Wong KK, Khatri I, Shaha S, Spaner DE, Gorczynski RM. The role of CD200 in  
891 immunity to B cell lymphoma. *J Leukoc Biol* 2010; **88**: 361–372.
- 892 69 Caserta S, Nausch N, Sawtell A, Drummond R, Barr T, MacDonald AS *et al.* Chronic  
893 infection drives expression of the inhibitory receptor CD200R, and its ligand CD200, by  
894 mouse and human CD4 T cells. *PLoS One* 2012; **7**: e35466.
- 895 70 Foster-Cuevas M, Westerholt T, Ahmed M, Brown MH, Barclay AN, Voigt S.  
896 Cytomegalovirus e127 protein interacts with the inhibitory CD200 receptor. *J Virol* 2011;  
897 **85**: 6055–9.
- 898 71 Foster-Cuevas M, Wright GJ, Puklavec MJ, Brown MH, Barclay AN. Human herpesvirus  
899 8 K14 protein mimics CD200 in down-regulating macrophage activation through CD200  
900 receptor. *J Virol* 2004; **78**: 7667–76.
- 901 72 Alves JM, Carneiro M, Cheng JY, Matos AL de, Rahman MM, Loog L *et al.* Parallel  
902 adaptation of rabbit populations to myxoma virus. *Science* 2019; : eaau7285.
- 903 73 Barclay AN, Hatherley D. The Counterbalance Theory for Evolution and Function of  
904 Paired Receptors. *Immunity* 2008; **29**: 675–678.
- 905 74 Tovar C, Obendorf D, Murchison EP, Papenfuss AT, Kreiss A, Woods GM. Tumor-

906 specific diagnostic marker for transmissible facial tumors of tasmanian devils:  
907 Immunohistochemistry studies. *Vet Pathol* 2011; **48**: 1195–1203.

908 75 Marx V. Calling the next generation of affinity reagents. *Nat Methods* 2013; **10**: 829–833.

909 76 Grabherr MG, Haas BJ, Yassour M, Levin JZ, Thompson DA, Amit I *et al*. Full-length  
910 transcriptome assembly from RNA-Seq data without a reference genome. *Nat Biotechnol*  
911 2011; **29**: 644–52.

912 77 Kowarz E, Löscher D, Marschalek R. Optimized Sleeping Beauty transposons rapidly  
913 generate stable transgenic cell lines. *Biotechnol J* 2015; **10**: 647–653.

914 78 Mátés L, Chuah MKL, Belay E, Jerchow B, Manoj N, Acosta-Sanchez A *et al*. Molecular  
915 evolution of a novel hyperactive Sleeping Beauty transposase enables robust stable gene  
916 transfer in vertebrates. *Nat Genet* 2009; **41**: 753–761.

917 79 Waldo GS, Standish BM, Berendzen J, Terwilliger TC. Rapid protein-folding assay using  
918 green fluorescent protein. *Nat Biotechnol* 1999; **17**: 691–5.

919 80 Kozak M. An analysis of 5'-noncoding sequences from 699 vertebrate messenger RNAs.  
920 *Nucleic Acids Res* 1987; **15(20)**: 8125–8148.

921 81 Gasteiger E, Hoogland C, Gattiker A, Duvaud S, Wilkins MR, Appel RD *et al*. Protein  
922 identification and analysis tools in the ExPASy server. In: Walker JM (ed). *The*  
923 *Proteomics Protocols Handbook*. Humana Press, 2005, pp 571–607.

924 82 Robinson M, McCarthy D, Smyth G. edgeR: a Bioconductor package for differential  
925 expression analysis of digital gene expression data. *Bioinformatics* 2010; **26**: 139–140.

926  
927  
928



930 **FIGURES**

931

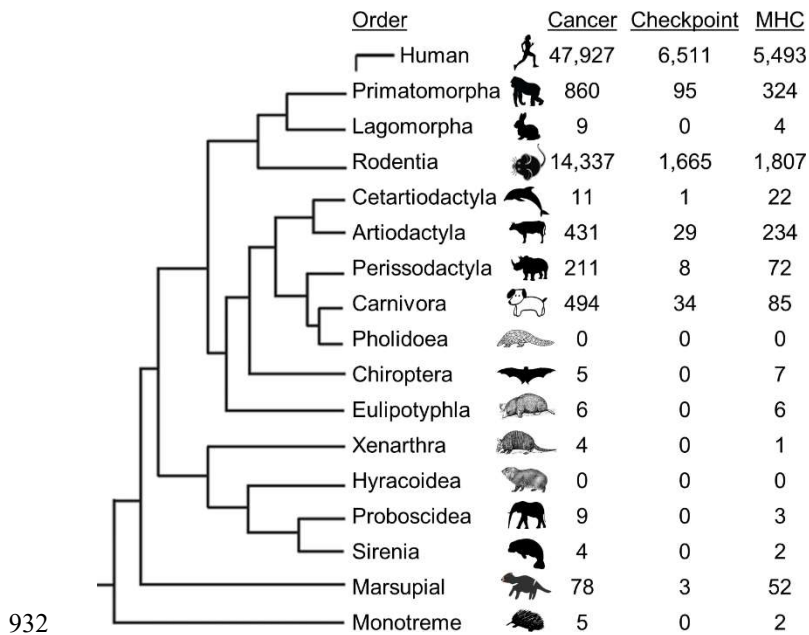

932

933

934 **Figure 1. Phylogenetic tree of immune system related studies in mammal orders 2009-2019.**

935 Metastatic cancer has been reported in nearly all mammalian orders and major histocompatibility  
936 complexes (MHC) have been the most intensely studied molecules in most orders. In the past  
937 decade, studies of immune checkpoint molecules (PD1, PDL1, CTLA4) have become a primary  
938 focus in humans and rodents. However, immune checkpoint studies in other species are limited,  
939 particularly at the protein level, due to the lack of species-specific reagents. This creates a vast gap  
940 in our understanding of the evolution of the mammalian immune system. The numbers in the  
941 columns represent the number studies matching Web of Science search results between 2009-2019.

942 See Table S1 for search terms.

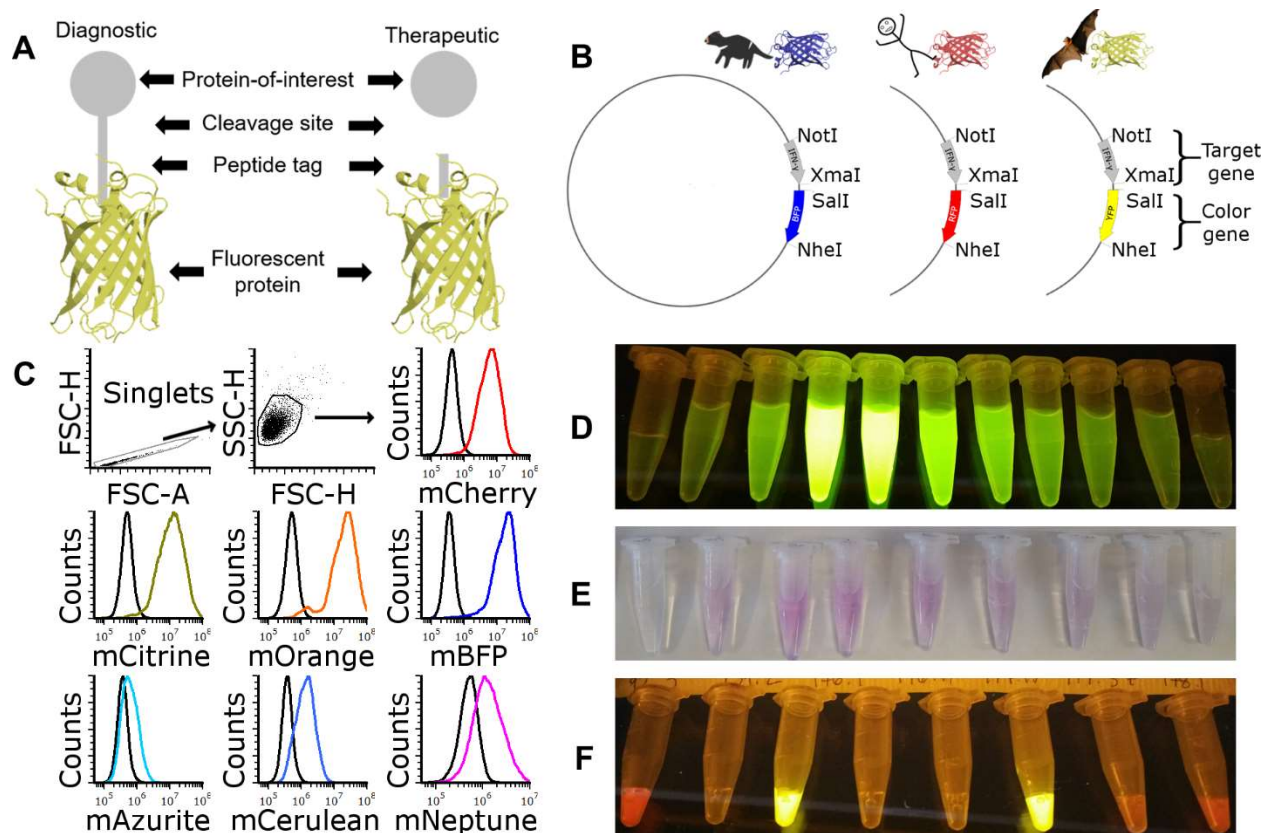

943  
 944 **Figure 2. FAST protein schematic and initial testing.** (A) Schematic diagram of FAST protein  
 945 therapeutic and diagnostic (i.e. theranostic) features and (B) vector map showing restriction sites  
 946 for swapping the target gene (i.e. gene-of-interest) and color genes (i.e. fluorescent protein). (C)  
 947 Results of flow cytometry binding assay with devil 41BB FAST proteins. The colored lines in  
 948 the histograms show binding of devil 41BB fused to mCherry, mCitrine, mOrange, mTagBFP,  
 949 mAzurite, mCerulean3, or mNeptune2 to CHO cells transfected with devil 41BBL, and the black  
 950 lines show binding to untransfected CHO cells. (D-E) Images showing the gradient of FAST  
 951 proteins eluted from HisTrap columns. (D) mCitrine excited with blue light and (E) chromogenic  
 952 visualization of mCherry without excitation. (F) Image of 100  $\mu$ L of FAST protein excited with  
 953 blue light (NOTE: mBFP appears clear with blue excitation and amber filter unit).

954

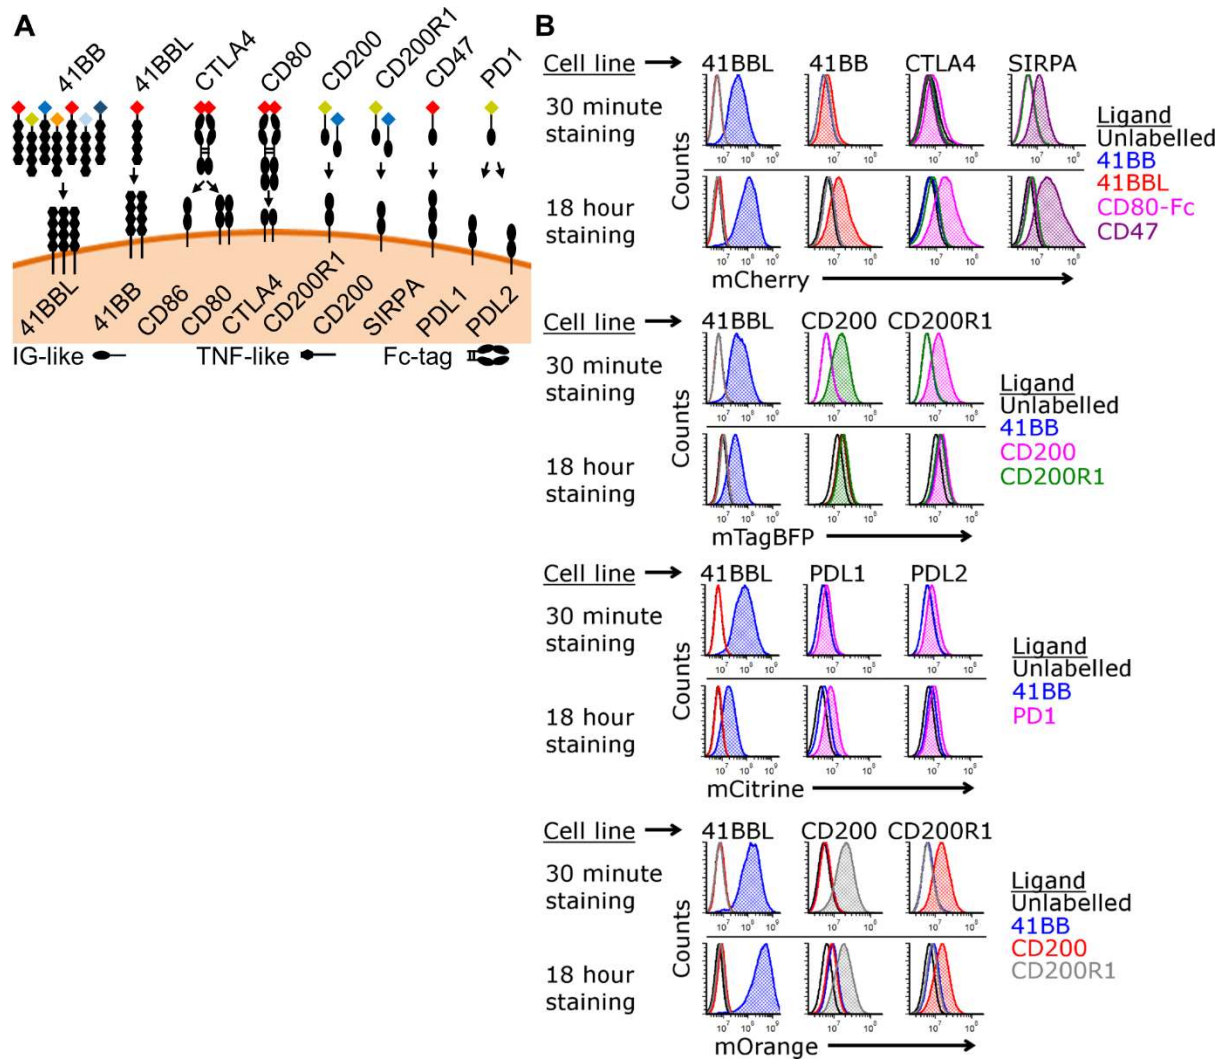

955

956 **Figure 3. Map and testing of soluble FAST proteins.** (A) Diagram of soluble FAST

957 proteins and full-length proteins used for testing of FAST proteins. 41BBL is a type II

958 transmembrane protein; all other proteins are type I. CD80 and CTLA4 soluble FAST proteins

959 included a devil IgG Fc-tag. Arrows indicate interactions confirmed in this study. (B) Histograms

960 showing binding of FAST proteins to CHO cells expressing full-length devil proteins. Target CHO

961 cells were cultured with chloroquine to block lysosomal degradation of FAST proteins and

962 maintain fluorescent signal during live-culture binding assays with 2  $\mu$ g/well of purified FAST

963 proteins for 30 minutes or 18 hours to assess receptor-ligand binding (n=1/time point).

964

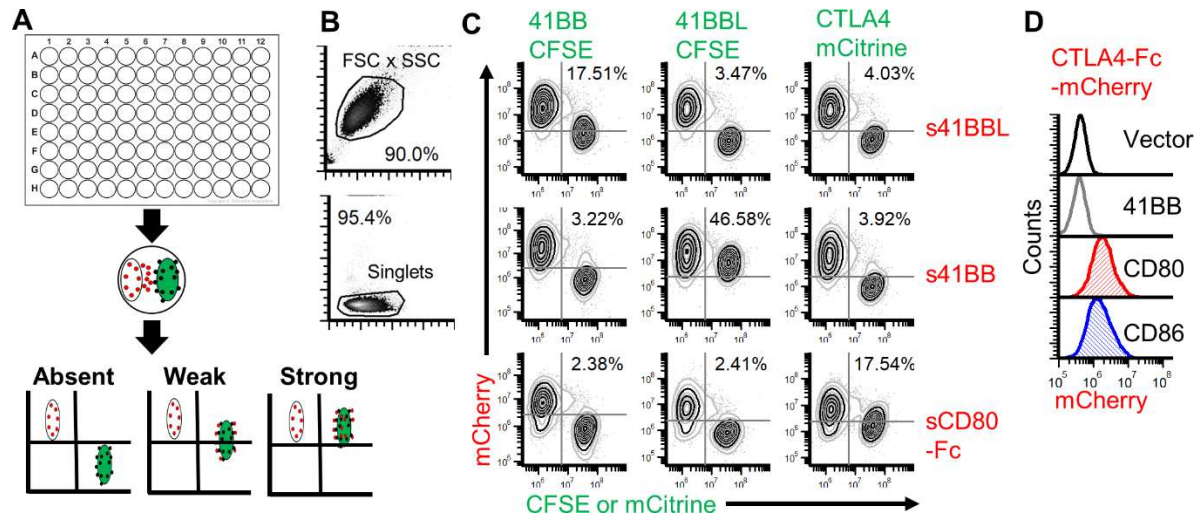

965

966 **Figure 4. Live-cell coculture assays with FAST proteins.** (A) Schematic of coculture assays to

967 assess checkpoint molecule interactions (Absent, Weak, Strong). Cells were mixed and cultured

968 overnight with chloroquine. Protein binding and/or transfer were assessed using flow cytometry.

969 (B) Gating strategy for coculture assays. (C) CHO cells that secrete 41BBL-mCherry, 41BB-

970 mCherry, or CD80-Fc-mCherry were cocultured overnight with target CHO cells that express full-

971 length 41BB, 41BBL, or CTLA4. 41BB and 41BB-L were labeled with CFSE, whereas full-length

972 CTLA4 was directly fused to mCitrine. Cells that secrete mCherry FAST proteins appear in the

973 upper left quadrant. Cells expressing full-length proteins and labeled with CFSE or mCitrine

974 appear in the lower right quadrant. Cells in the upper right quadrant represent binding of mCherry

975 FAST proteins to full-length proteins on CFSE or mCitrine labeled cells. Results shown are

976 representative of n=3/treatment. (D) CTLA4-Fc-mCherry FAST protein binding to DFT cells.

977 DFT1 C5065 cells transfected with control vector (black), 41BB (gray), CD80 (red), or CD86

978 (blue) were stained with CTLA4-Fc-mCherry supernatant with chloroquine. Results are

979 representative of n=2 replicates/treatment.

980

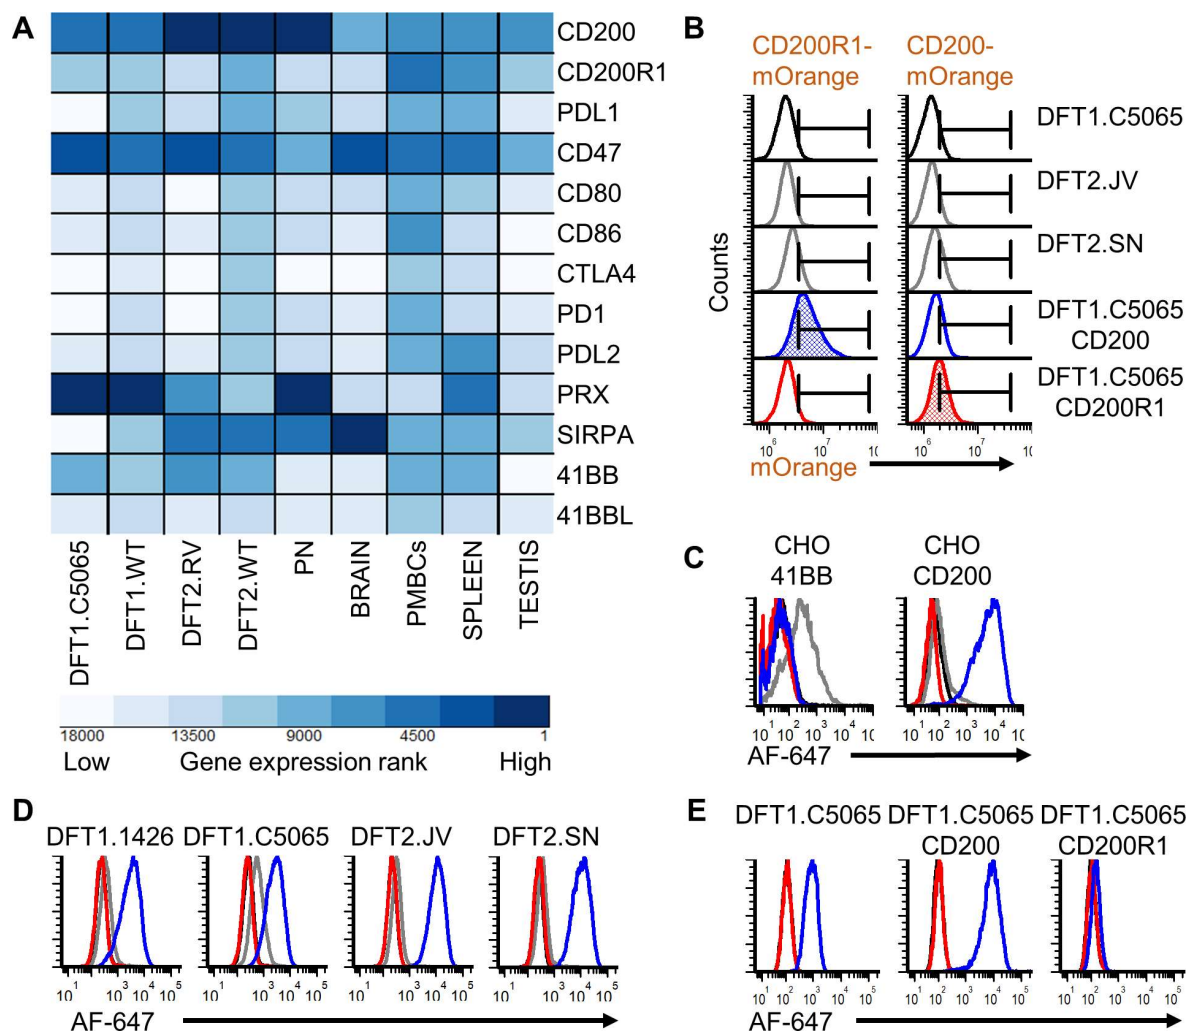

981  
982 **Figure 5. Elevated CD200 expression on DFT cells.** (A) Heatmap showing within sample  
983 transcript ranking (1 = highest expression) according to RPKM-normalized mRNA sequencing  
984 counts of 18,788 annotated coding genes (devil\_refv7.0; GCA\_000189315.1). Genes-of-interest  
985 for this study are plotted as heatmap with dark blue indicating the most highly expressed genes.  
986 Technical replicates (n=2) were used for all tissues, except peripheral nerve (PN) (n=1). (B) Wild  
987 type DFT1.C5065, DFT2.JV, DFT2.SN, and DFT1.C5065 transfected to overexpress CD200 or  
988 CD200R1 were stained with 5  $\mu$ g of either CD200R1-mOrange or CD200-mOrange FAST protein.  
989 Histograms filled with blue or red highlight the cells overexpressing CD200 or CD200R1 and their  
990 expected binding interactions with CD200R1 and CD200, respectively. Target cells were cultured



991 with FAST proteins in chloroquine, incubated 30 minutes, and run without washing. Results are  
992 representative of n=2 replicates/treatment. (C) Mice were immunized with TEV digested 41BB or  
993 CD200 FAST proteins. Black = pre-immune (PI) and gray = immune (I) sera from a mouse  
994 immunized with 41BB; red = pre-immune (PI) and blue = immune (I) sera from a mouse  
995 immunized with CD200. CHO cells transfected with either full-length 41BB or CD200 were  
996 stained with sera and then anti-mouse AlexaFluor-647. Results are representative of  
997 n=2/treatment. (D) Sera was used to screen two strains of DFT1 and two strains of DFT2 cells for  
998 41BB and CD200 expression. PI sera was negative in all cases, whereas all DFT1 and DFT2 cells  
999 expressed CD200. Results are representative of n=3/treatment. (E) DFT1 C5065 transfected with  
1000 either vector control, CD200, or CD200R1 were stained with purified polyclonal anti-CD200 and  
1001 anti-mouse IgG AlexaFluor 647 (black = no antibodies, red = secondary antibody only, blue =  
1002 primary + secondary antibody). Results are representative of n=2/treatment.  
1003

1004

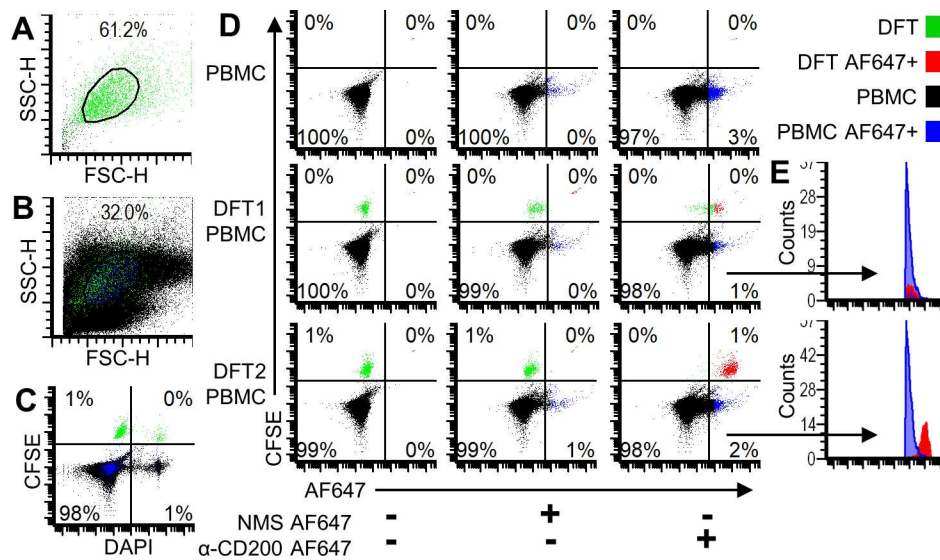

1005

1006 **Figure 6. CD200 identifies DFT cells in whole blood.** Color dot plots showing DFT cells in green  
 1007 (CFSE), PBMCs in black, DFT Alexa Fluor 647+ (AF647) cells in red, and PBMC AF647+ in  
 1008 blue. (A) Forward- and side-scatter plot of DFT.JV cells and (B) DFT.JV cells mixed with PBMCs.  
 1009 (C) Color dot plot showing dead cells stained with DAPI (right quadrants) and CFSE-labeled DFT  
 1010 cells (upper quadrants). (D) The top row shows unmixed PBMCs. The middle row and bottom row  
 1011 show DFT1.C5065 and DFT2.JV cells, respectively, mixed with PBMCs. Alexa Fluor 647+ DFT  
 1012 (red) and PBMC (blue) are in the right quadrants. (E) Histogram overlays to highlight AF647+  
 1013 (right quadrants) from DFT1-PBMC and DFT2-PBMC mixtures. Cells were analyzed on the  
 1014 Beckman-Coulter MoFlo Astrios.

1015

1016 **TABLES (See supplementary Materials)**

1017

1018

1019

1020

1021 **SUPPLEMENTARY INFORMATION**

1022

1023 **TITLE**

1024 A novel system to map protein interactions reveals evolutionarily conserved immune evasion  
1025 pathways on transmissible cancers

1026

1027 **SHORT TITLE**

1028 Immune checkpoints on transmissible cancers

1029

1030 **AUTHORS**

1031 Andrew S. Flies<sup>1\*</sup>, Jocelyn M. Darby<sup>1</sup>, Patrick R. Lennard<sup>1,2</sup>, Peter R. Murphy<sup>1,3</sup>, Chrissie E. B.  
1032 Ong<sup>1</sup>, Terry L. Pinfold<sup>4</sup>, A. Bruce Lyons<sup>4</sup>, Gregory M. Woods<sup>1</sup>, Amanda L. Patchett<sup>1</sup>

1033

1034 **AFFILIATIONS**

1035 <sup>1</sup>Menzies Institute for Medical Research, College of Health and Medicine, University of Tasmania,  
1036 Hobart, TAS 7000, Australia

1037 <sup>2</sup>The Roslin Institute and Royal School of Veterinary Studies, University of Edinburgh, Easter  
1038 Bush Campus, Midlothian, EH25 9RG, UK

1039 <sup>3</sup>University of Queensland Diamantina Institute, The University of Queensland, Translational  
1040 Research Institute, Woolloongabba, Queensland, Australia

1041 <sup>4</sup>School of Medicine, College of Health and Medicine, University of Tasmania, Hobart, TAS 7000,  
1042 Australia

1043

1044 **CORRESPONDING AUTHOR CONTACT INFORMATION**

1045 **Andrew S. Flies, PhD**

1046 Menzies Institute for Medical Research

1047 College of Health and Medicine

1048 University of Tasmania

1049 Private Bag 23, Hobart TAS 7000

1050 phone: +61 3 6226 4614

1051 email: [Andy.Flies@utas.edu.au](mailto:Andy.Flies@utas.edu.au)

1052

1053

1054 **SUPPLEMENTARY MATERIALS AND METHODS**

A

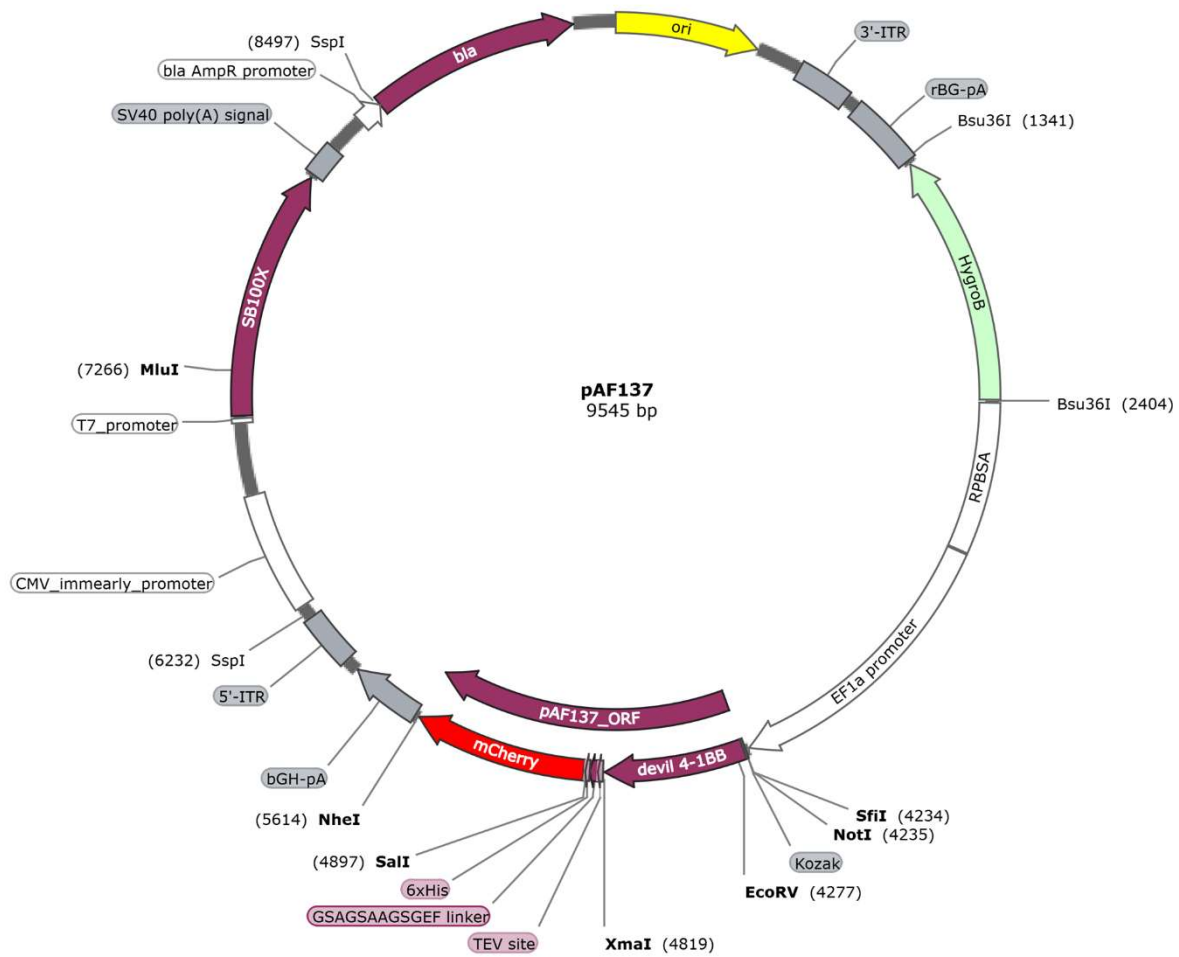

B

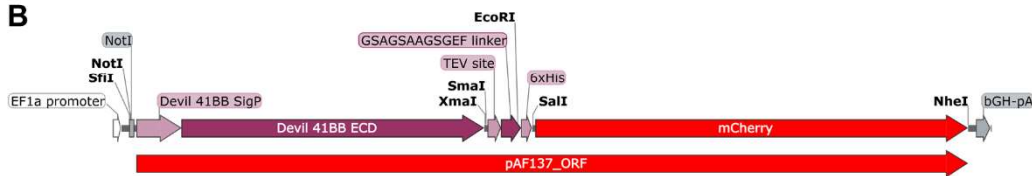

C

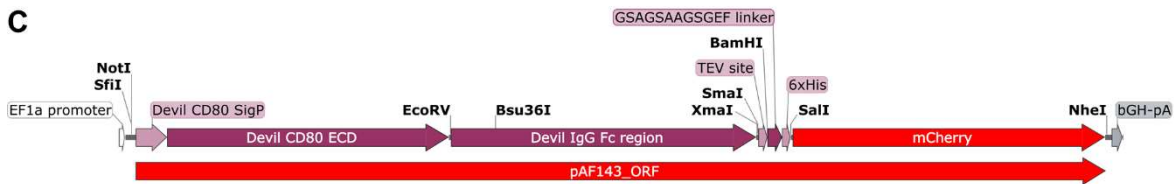

D

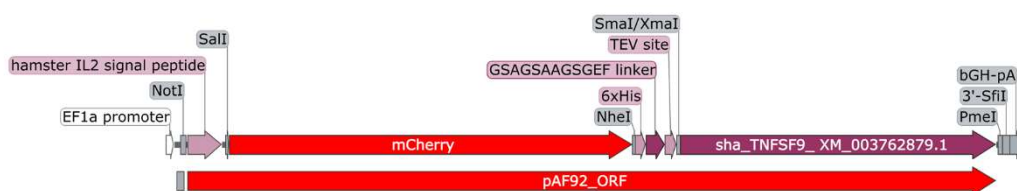

1055

1056 **Figure S1. FAST protein base vectors.** (A) CMV promoter and SB100X transposase were  
1057 inserted into a Sleeping Beauty vector (shown here with 41BB-mCherry FAST protein cassette  
1058 pAF137). (B) Type I FAST protein cassette. The native signal peptide (SigP) and predicted  
1059 extracellular domain (ECD) were used for all type I FAST proteins. The devil 41BB SigP-ECD  
1060 was fused to mCherry via a TEV cleavage site (ENLYFQG), linker peptide (GSAGSAAGSGEF),  
1061 and a 6x-His tag (HHHHHH). Restriction digest sites were included at the 5' and 3' ends of the  
1062 gene-of-interest and the fluorescent protein to facilitate swapping of genes and fluorescent  
1063 proteins. The human EF1 $\alpha$  promoter is upstream and bovine growth hormone (bGH) poly(A) tail  
1064 is downstream of the open reading frame. (C) Type I FAST protein cassette with Fc tag. This  
1065 vector was the same as the type I FAST vectors, except that the Fc fragment of devil IgG was  
1066 inserted between the gene-of-interest (e.g. CD80) and the TEV cleavage site. (D) Type II FAST  
1067 protein cassette. To increase the probability of efficient secretion of type II FAST proteins from  
1068 Chinese hamster ovary (CHO) cells, we used the hamster IL-2 signal peptide at the N-terminus of  
1069 the protein, including a Sall restriction site, followed by mCherry, an NheI restriction site, 6x-His-  
1070 tag, linker peptide, TEV cleavage site, XmaI/SmaI restriction site, the gene-of-interest, and a PmeI  
1071 restriction site following the stop codon.  
1072

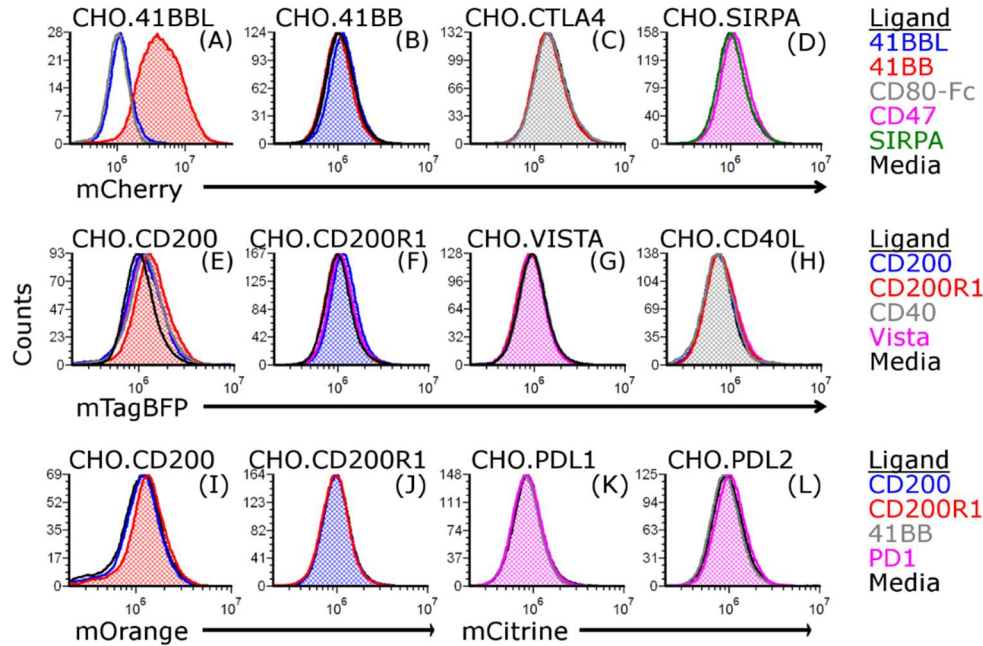

**Figure S2. Screening FAST protein supernatants.** Staining was performed using supernatants from FAST protein CHO cell lines; supernatants were collected 11 days post-transfection. Supernatants from FAST cell lines were incubated with CHO cells expressing full-length devil proteins at room temperature for 30 minutes before washing and fixing for flow cytometric analysis. Chloroquine was not used during these incubation steps.



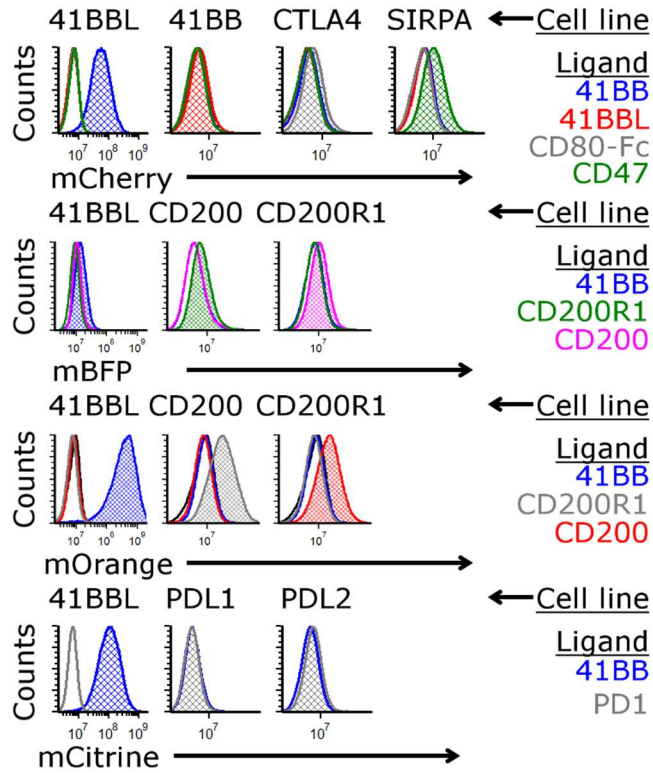

1080

1081 **Figure S3. Screening FAST protein supernatants.** Staining was performed using supernatants  
1082 from FAST protein CHO cell lines; supernatants were collected around 2-3 weeks post-  
1083 transfection and stored for 2 months at 4 °C. Supernatants from FAST cell lines were diluted 1:1  
1084 with 100  $\mu$ M chloroquine (50  $\mu$ M final concentration) in cRF5 without phenol red incubated with  
1085 CHO cells expressing full-length devil proteins at room temperature for 60 minutes before washing  
1086 and fixing for flow cytometric analysis.

1087

1088

1089

1090

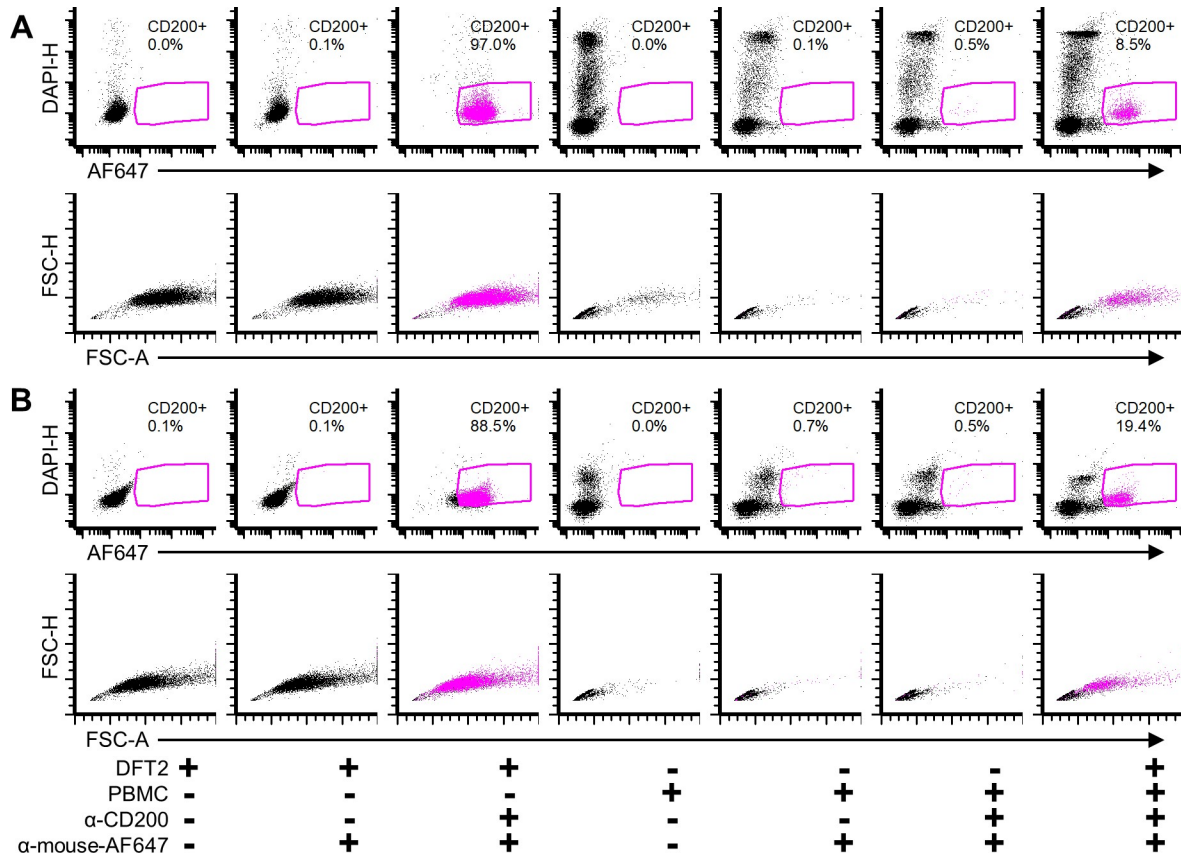

**Figure S4. CD200 identifies DFT2 cells in PBMCs.** (A) PBMCs isolated on histopaque, frozen, thawed, and cultured for 2 hours at 37 °C prior to use. DFT2 cells and PBMCs were stained separately by blocking with normal goat serum and then staining with anti-CD200 serum and anti-mouse IgG Alexa-647. Cells were then washed, stained with DAPI, and analyzed on a BD FACSCanto II. The stained DFT2 cells and PBMCs were then mixed at 1:10 to see if gating and CD200 signal could be used to distinguish DFT2 cells from PBMCs (n=1/treatment). (B) The procedure used for A was repeated except that DFT2 cells and PBMCs were mixed at 1:5.

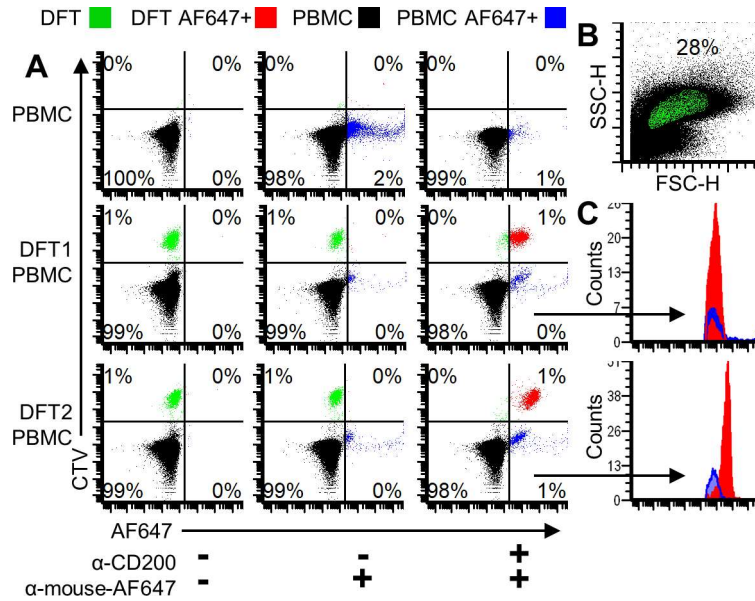

**Figure S5. CD200 identifies DFT cells in whole blood.** Color dot plots showing DFT cells in green (CellTrace Violet<sup>®</sup>), PBMCs in black, DFT Alexa Fluor 647+ (AF647) cells in red, and PBMC AF647+ in blue. (A) The top row shows unmixed PBMCs. The middle row and bottom row show DFT1.C5065 and DFT2.JV cells, respectively, mixed with PBMCs. Alexa Fluor 647+ DFT (red) and PBMC (blue) are in the right quadrants. (B) Forward- and side-scatter plot of DFT.JV cells mixed with PBMCs. Backgating of CFSE+ cells was used to create a forward-scatter by side-scatter gate that was used as the parent gate for all data shown here. (C) Histogram overlays to highlight AF647+ (right quadrants) from DFT1-PBMC and DFT2-PBMC mixtures. Cells were analyzed on the Beckman-Coulter MoFlo Astrios.

1091

1092

1093

1094

1095 **Table S1. Search terms for mammalian immune research studies.**

1096

1097 **Table S2. Summary and genes and plasmids.**

1098

1099 **Table S3. Vector backbones and insert cassette components.**

1100

1101 **Table S4. Primer sequences and gBlocks for plasmid assembly.**

1102

1103 **Table S5. gBlocks used for assembling plasmids.**

1104

1105
