# Supplementary material for: A novel system to map protein interactions reveals evolutionarily conserved immune evasion pathways on transmissible cancers
Source: bioRxiv or medRxiv preprint supplement (doi:10.1101/831404), 2020-01-03
Supplement: Supplementary file [file media-1.pdf]

1 **SUPPLEMENTARY INFORMATION**

2

3 **TITLE**

4 Immune checkpoint proteins are conserved across 160 million years of evolution and are expressed  
5 on transmissible cancers

6

7 **RUNNING TITLE**

8 Transmissible cancers express evolutionarily conserved immune checkpoint molecules

9

10 **AUTHORS**

11 Andrew S. Flies<sup>1\*</sup>, Jocelyn M. Darby<sup>1</sup>, Patrick R. Lennard<sup>1,2</sup>, Peter R. Murphy<sup>1,3</sup>, Chrissie E. B.  
12 Ong<sup>1</sup>, Terry L. Pinfold<sup>4</sup>, A. Bruce Lyons<sup>4</sup>, Gregory M. Woods<sup>1</sup>, Amanda L. Patchett<sup>1</sup>

13

14 **AFFILIATIONS**

15 <sup>1</sup>Menzies Institute for Medical Research, College of Health and Medicine, University of Tasmania,  
16 Hobart, TAS 7000, Australia

17 <sup>2</sup>The Roslin Institute and Royal School of Veterinary Studies, University of Edinburgh, Easter  
18 Bush Campus, Midlothian, EH25 9RG, UK

19 <sup>3</sup>University of Queensland Diamantina Institute, The University of Queensland, Translational  
20 Research Institute, Woolloongabba, Queensland, Australia

21 <sup>4</sup>School of Medicine, College of Health and Medicine, University of Tasmania, Hobart, TAS 7000,  
22 Australia

23

24 **CORRESPONDING AUTHOR CONTACT INFORMATION**

25 **Andrew S. Flies, PhD**

26 Menzies Institute for Medical Research

27 College of Health and Medicine

28 University of Tasmania

29 Private Bag 23, Hobart TAS 7000

30 phone: +61 3 6226 4614

31 email: [Andy.Flies@utas.edu.au](mailto:Andy.Flies@utas.edu.au)

32

33



**A**

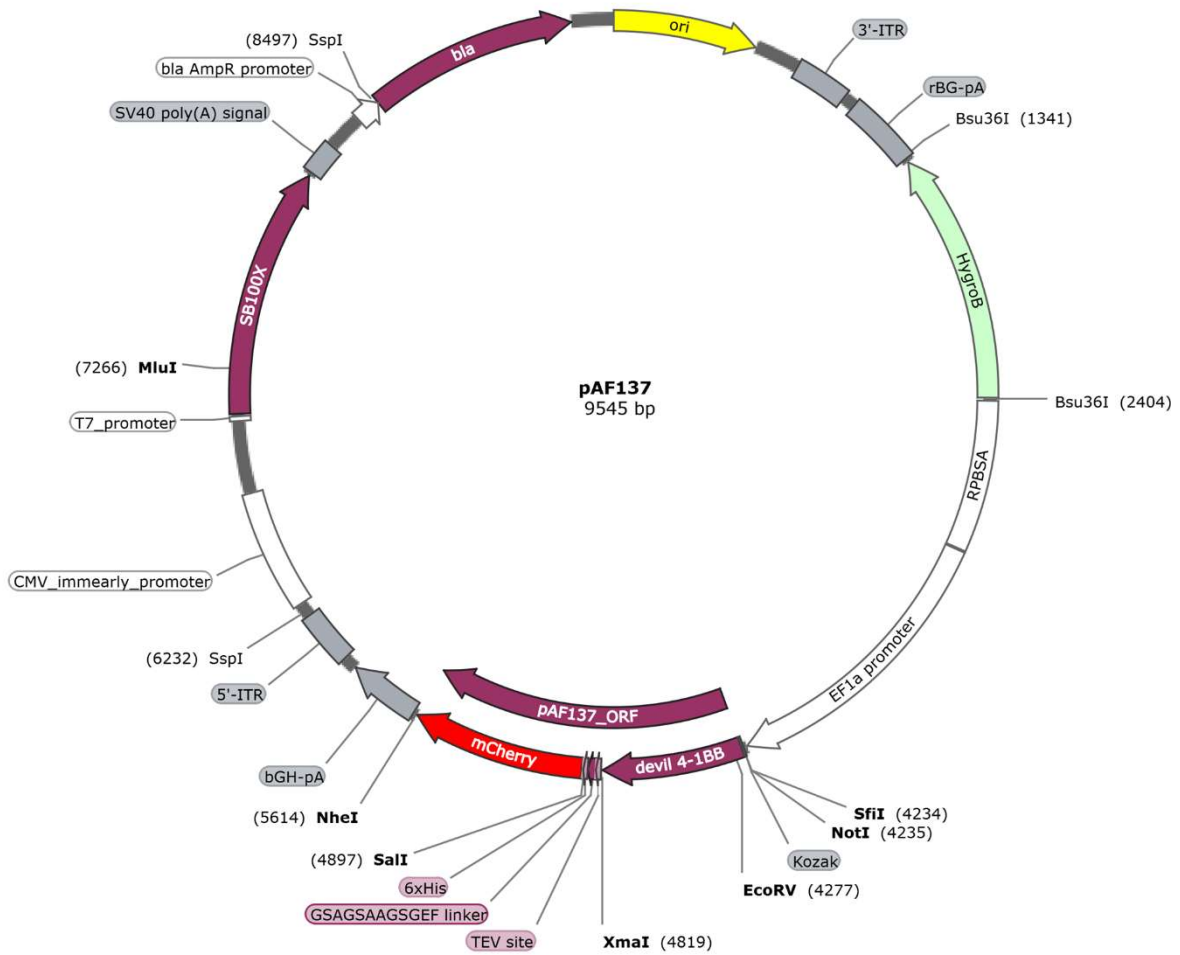

**B**

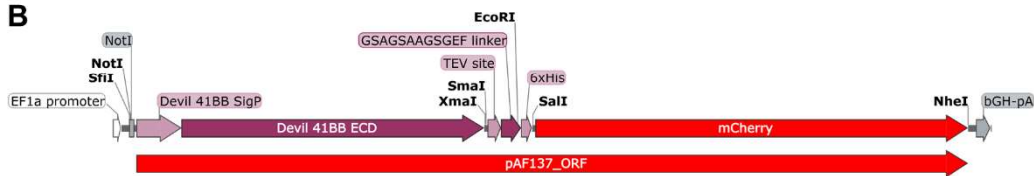

**C**

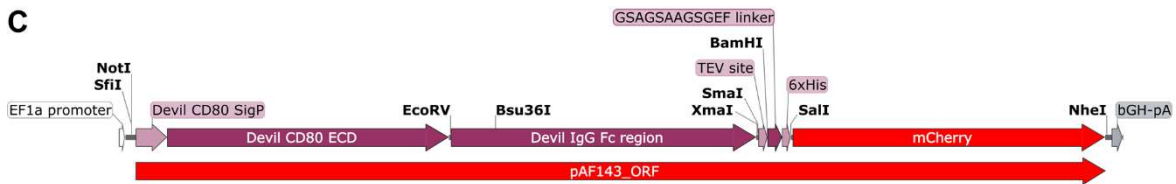

**D**

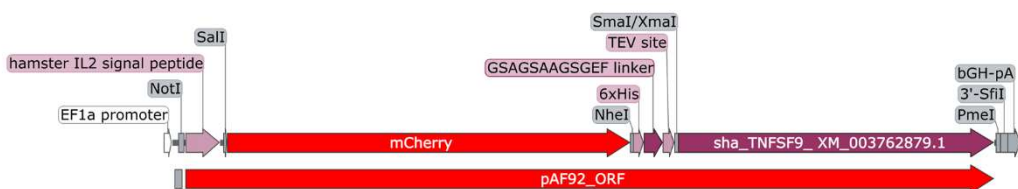

36 **Figure S1. FAST protein base vectors.** (A) CMV promoter and SB100X transposase were  
37 inserted into a Sleeping Beauty vector (shown here with 41BB-mCherry FAST protein cassette  
38 pAF137). (B) Type I FAST protein cassette. The native signal peptide (SigP) and predicted  
39 extracellular domain (ECD) were used for all type I FAST proteins. The devil 41BB SigP-ECD  
40 was fused to mCherry via a TEV cleavage site (ENLYFQG), linker peptide (GSAGSAAGSGEF),  
41 and a 6x-His tag (HHHHHH). Restriction digest sites were included at the 5' and 3' ends of the  
42 gene-of-interest and the fluorescent protein to facilitate swapping of genes and fluorescent  
43 proteins. The human EF1 $\alpha$  promoter is upstream and bovine growth hormone (bGH) poly(A) tail  
44 is downstream of the open reading frame. (C) Type I FAST protein cassette with Fc tag. This  
45 vector was the same as the type I FAST vectors, except that the Fc fragment of devil IgG was  
46 inserted between the gene-of-interest (e.g. CD80) and the TEV cleavage site. (D) Type II FAST  
47 protein cassette. To increase the probability of efficient secretion of type II FAST proteins from  
48 Chinese hamster ovary (CHO) cells, we used the hamster IL-2 signal peptide at the N-terminus of  
49 the protein, including a Sall restriction site, followed by mCherry, an NheI restriction site, 6x-His-  
50 tag, linker peptide, TEV cleavage site, XmaI/SmaI restriction site, the gene-of-interest, and a PmeI  
51 restriction site following the stop codon.

52

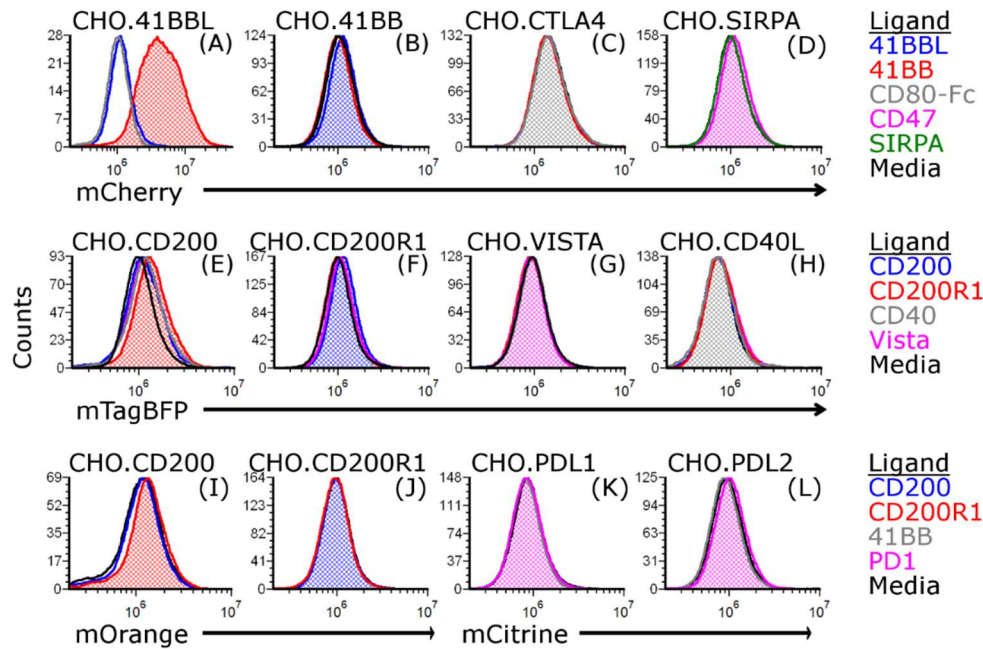

53

54 **Figure S2. Screening FAST protein supernatants.** Staining was performed using supernatants

55 from FAST protein CHO cell lines; supernatants were collected 11 days post-transfection.

56 Supernatants from FAST cell lines were incubated with CHO cells expressing full-length devil

57 proteins at room temperature for 30 minutes before washing and fixing for flow cytometric

58 analysis. Chloroquine was not used during these incubation steps.

59

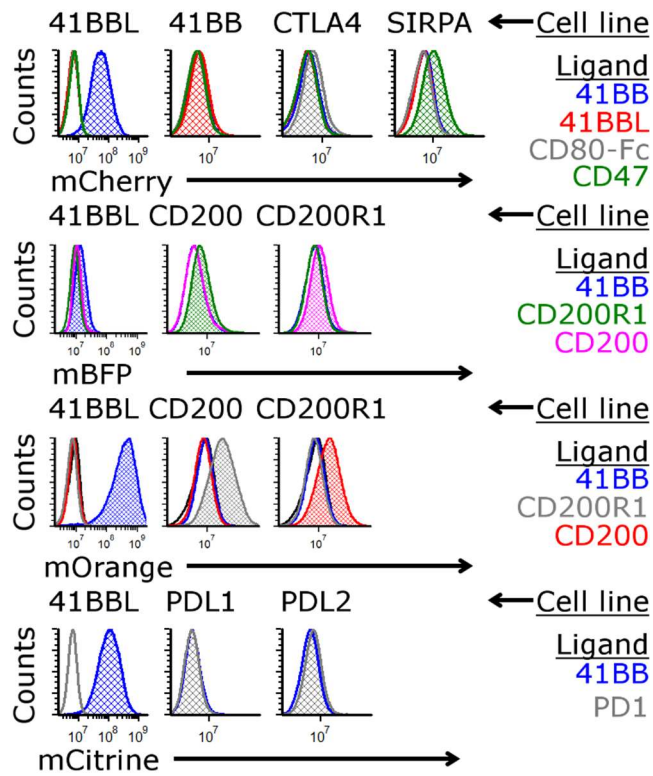

60

61 **Figure S3. Screening FAST protein supernatants.** Staining was performed using supernatants

62 from FAST protein CHO cell lines; supernatants were collected around 2-3 weeks post-

63 transfection and stored for 2 months at 4 °C. Supernatants from FAST cell lines were diluted 1:1

64 with 100 μM chloroquine (50 μM final concentration) in cRF5 without phenol red incubated with

65 CHO cells expressing full-length devil proteins at room temperature for 60 minutes before washing

66 and fixing for flow cytometric analysis.

67

68

69

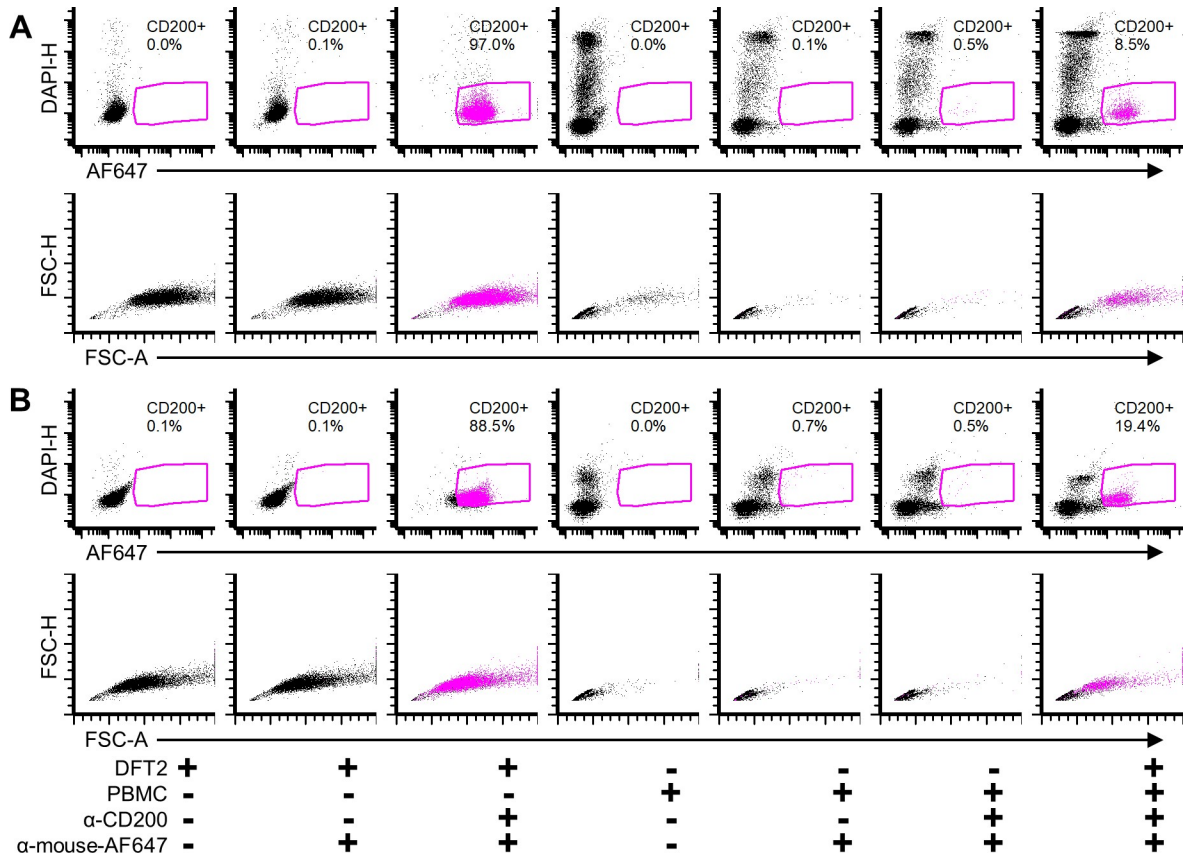

**Figure S4. CD200 identifies DFT2 cells in PBMCs.** (A) PBMCs isolated on histopaque, frozen, thawed, and cultured for 2 hours at 37 °C prior to use. DFT2 cells and PBMCs were stained separately by blocking with normal goat serum and then staining with anti-CD200 serum and anti-mouse IgG Alexa-647. Cells were then washed, stained with DAPI, and analyzed on a BD FACSCanto II. The stained DFT2 cells and PBMCs were then mixed at 1:10 to see if gating and CD200 signal could be used to distinguish DFT2 cells from PBMCs (n=1/treatment). (B) The procedure used for A was repeated except that DFT2 cells and PBMCs were mixed at 1:5.



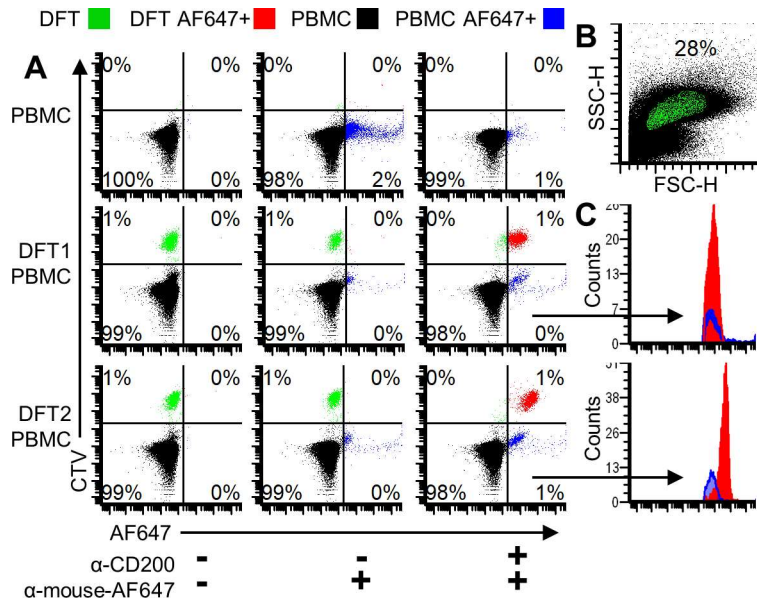

**Figure S5. CD200 identifies DFT cells in whole blood.** Color dot plots showing DFT cells in green (CellTrace Violet<sup>®</sup>), PBMCs in black, DFT Alexa Fluor 647+ (AF647) cells in red, and PBMC AF647+ in blue. (A) The top row shows unmixed PBMCs. The middle row and bottom row show DFT1.C5065 and DFT2.JV cells, respectively, mixed with PBMCs. Alexa Fluor 647+ DFT (red) and PBMC (blue) are in the right quadrants. (B) Forward- and side-scatter plot of DFT.JV cells mixed with PBMCs. Backgating of CFSE+ cells was used to create a forward-scatter by side-scatter gate that was used as the parent gate for all data shown here. (C) Histogram overlays to highlight AF647+ (right quadrants) from DFT1-PBMC and DFT2-PBMC mixtures. Cells were analyzed on the Beckman-Coulter MoFlo Astrios.

71

72

73

74

75 **Table S1. Search terms for mammalian immune research studies.**

76

77 **Table S2. Summary and genes and plasmids.**

78

79 **Table S3. Vector backbones and insert cassette components.**

80

81 **Table S4. Primer sequences and gBlocks for plasmid assembly.**

82

83 **Table S5. gBlocks used for assembling plasmids.**

84
